## RESEARCH ARTICLE

# *In vivo* and *in vitro* assessment of cardiac $\beta$ -adrenergic receptors in larval zebrafish (*Danio rerio*)

Shelby L. Steele<sup>1,\*</sup>, Xiaodi Yang<sup>2,3</sup>, Mélanie Debais-Thibaud<sup>1</sup>, Thorsten Schwerte<sup>4</sup>, Bernd Pelster<sup>4</sup>, Marc Ekker<sup>1</sup>, Mario Tiberi<sup>2,3,†</sup> and Steve F. Perry<sup>1,†</sup>

<sup>1</sup>Department of Biology, University of Ottawa, Ottawa, ON, Canada, K1N 6N5, <sup>2</sup>Ottawa Hospital Research Institute, Neuroscience Program, Ottawa, ON, Canada, K1Y 4E9, <sup>3</sup>Department of Medicine, Department of Cellular and Molecular Medicine and Department of Psychiatry, University of Ottawa, Ottawa, ON, Canada, K1H 8M5 and <sup>4</sup>Institute of Zoology, University of Innsbruck, 6020 Innsbruck, Austria

\*Author for correspondence (sstee057@uottawa.ca)

<sup>†</sup>These authors contributed equally to this work

### SUMMARY

$\beta$ -Adrenergic receptors ( $\beta$ ARs) are crucial for maintaining the rate and force of cardiac muscle contraction in vertebrates. Zebrafish (*Danio rerio*) have one  $\beta$ 1AR gene and two  $\beta$ 2AR genes ( $\beta$ 2aAR and  $\beta$ 2bAR). We examined the roles of these receptors in larval zebrafish *in vivo* by assessing the impact of translational gene knockdown on cardiac function. Zebrafish larvae lacking  $\beta$ 1AR expression by morpholino knockdown displayed lower heart rates than control fish, whereas larvae deficient in both  $\beta$ 2aAR and  $\beta$ 2bAR expression exhibited significantly higher heart rates than controls. These results suggested a potential inhibitory role for one or both  $\beta$ 2AR genes. By using cultured HEK293 cells transfected with zebrafish  $\beta$ ARs, we demonstrated that stimulation with adrenaline or procaterol (a  $\beta$ 2AR agonist) resulted in an increase in intracellular cAMP levels in cells expressing any of the three zebrafish  $\beta$ ARs. In comparison with its human  $\beta$ AR counterpart, zebrafish  $\beta$ 2aAR expressed in HEK293 cells appeared to exhibit a unique binding affinity profile for adrenergic ligands. Specifically, zebrafish  $\beta$ 2aAR had a high binding affinity for phenylephrine, a classical  $\alpha$ -adrenergic receptor agonist. The zebrafish receptors also had distinct ligand binding affinities for adrenergic agonists when compared with human  $\beta$ ARs in culture, with zebrafish  $\beta$ 2aAR being distinct from human  $\beta$ 2AR and zebrafish  $\beta$ 2bAR. Overall, this study provides insight into the function and evolution of both fish and mammalian  $\beta$ -adrenergic receptors.

Key words: morpholino, adenylyl cyclase, cardiac output, binding affinity, HEK293 cells.

### INTRODUCTION

Adrenergic receptors (adrenoreceptors, ARs) are G-protein-coupled receptors that transduce the cellular effects of adrenaline and noradrenaline and are expressed ubiquitously in vertebrate tissues (e.g. Cavalli et al., 1997; Tanoue et al., 2002). The  $\beta$ 1AR subtype is traditionally classified as the ‘cardiac’  $\beta$ AR because stimulation of  $\beta$ 1AR *in vivo* stimulates heart rate and contractility (Lands et al., 1967b).  $\beta$ 2ARs were originally thought to be restricted to the lungs and peripheral vasculature (Lands et al., 1967a); however, later studies have demonstrated significant expression of  $\beta$ 2ARs in the mammalian heart. Current models of heart function show that both of these  $\beta$ AR subtypes play critical roles in regulating the rate (chronotropy) and force (inotropy) of heart contraction (e.g. Bernstein, 2002; Brodde, 2008).

When considering heart rate,  $\beta$ 1AR appears to be exclusively stimulatory, whereas the role of  $\beta$ 2AR is less clear. Resting heart rate in  $\beta$ 1AR<sup>-/-</sup> and  $\beta$ 1AR<sup>-/-</sup> $\beta$ 2AR<sup>-/-</sup> mice was lower than in wild-types, while  $\beta$ 2AR loss of function alone had no effect (Ecker et al., 2006). Also, cardiac myocytes isolated from  $\beta$ 1AR<sup>-/-</sup> mice and exposed to isoproterenol showed an initial increase followed by a sustained decrease in contraction rate compared with baseline levels (Devic et al., 2001), suggesting a dual stimulatory/inhibitory role for the  $\beta$ 2AR receptor in these cells. An inhibitory role for cardiac  $\beta$ 2AR was recently proposed for larval zebrafish experiencing translational knockdown of M<sub>2</sub> muscarinic receptors because exposure to procaterol (a  $\beta$ 2AR agonist) caused a lowering

of heart rate (Steele et al., 2009). Because zebrafish have two distinct  $\beta$ 2AR receptors (herein termed  $\beta$ 2aAR and  $\beta$ 2bAR) (Wang et al., 2009), it is not clear whether one or both of the  $\beta$ 2ARs are contributing an inhibitory influence on heart function.

Numerous studies have assessed the contribution of adrenergic tone in maintaining resting heart rate in adult fish [for references, see Mendonça and Gamperl (Mendonça and Gamperl, 2009)]; however, considerably less is known about larval fish. Larval zebrafish begin to exhibit a chronotropic response to adrenergic agonists at 4 (Schwerte et al., 2006) or 6 days post-fertilization (d.p.f.) (Bagatto, 2005), and first demonstrate adrenergic tone at 5 d.p.f. (Schwerte et al., 2006). The role of specific  $\beta$ AR subtypes in regulating cardiac function and development beyond the measurement of cardiac frequency in zebrafish has yet to be explored. Both  $\beta$ 1AR and  $\beta$ 2AR subtypes are linked to stimulatory G-proteins (G<sub>s</sub>), which increase adenylyl cyclase activity yielding higher levels of cAMP and thus increasing cardiac chronotropy and inotropy. Whereas  $\beta$ 1AR is exclusively linked to G<sub>s</sub> proteins, a growing body of evidence suggests that the  $\beta$ 2 subtype also associates with inhibitory G<sub>i</sub> proteins and can thereby inhibit contraction of heart cells (e.g. Xiao et al., 1999; Bernstein, 2002). This dual coupling of  $\beta$ 2AR might help explain why this receptor is not involved to the same extent as  $\beta$ 1AR in G<sub>s</sub>-mediated cAMP accumulation in heart cells in some species [for references, see Xiao et al. (Xiao et al., 1999; Xiao, 2001)]. Molecular and pharmacological experiments have shown that there is significant

expression of  $\beta$ ARs in the fish heart, and that fish hearts are responsive to classic  $\beta$ AR ligands (Nickerson et al., 2001; Kawasaki et al., 2008; Mendonça and Gamperl, 2009; Steele et al., 2009). Some studies on fish  $\beta$ ARs have also shown that they can have unexpected affinity for (presumed) subtype-specific agonists. Phenylephrine, a classic  $\alpha$ -adrenergic receptor agonist, has similar competitive binding characteristics to noradrenaline for  $\beta$ -adrenergic receptors in catfish liver (Fabbri et al., 1992). Also,  $\beta$ 3bARs in red blood cells of rainbow trout have distinct  $\beta$ 2AR-like binding characteristics based on their affinity for classic  $\beta$ 2AR ligands (Nickerson et al., 2003). To date, the ligand binding affinities of zebrafish  $\beta$ ARs, and their ability to initiate intracellular cAMP accumulation *via* agonist stimulation, have yet to be explored.

The first goal of this study was to determine the developmental pattern of cardiac-type  $\beta$ -adrenergic receptor expression in zebrafish and distinguish its role in regulating heart function in early life. Developmental mRNA expression of the classic cardiac-type  $\beta$ -adrenergic receptors ( $\beta$ 1AR,  $\beta$ 2aAR,  $\beta$ 2bAR) was determined using semi-quantitative real-time PCR and qualitative *in situ* hybridization. Zebrafish larvae lacking expression of  $\beta$ 1AR,  $\beta$ 2aAR and  $\beta$ 2bAR either alone or in combination were generated by translational knockdown using antisense oligonucleotide morpholinos. Microscopic imaging techniques were used to determine heart rate, stroke volume and cardiac output in larvae at 4 d.p.f. Larvae were also exposed to a variety of adrenergic ligands to determine any heart rate and cardiac output changes related to agonist and antagonist exposure. The second goal was to characterize the affinity of each of the zebrafish cardiac-type  $\beta$ -adrenergic receptors for classic adrenergic ligands, as well as the ability of each receptor type to associate with  $G_s$  proteins within the cell. For this, the zebrafish  $\beta$ 1AR and  $\beta$ 2ARs were transiently expressed in HEK293 cells in culture to determine their affinity for common adrenergic agonists as well as their ability to initiate cAMP production within these cells.

## MATERIALS AND METHODS

### Zebrafish husbandry and culture

Adult zebrafish (*Danio rerio*, Hamilton 1822) were obtained from Big Al's Aquarium Services (Ottawa East, Ontario, Canada) and maintained in 101 acrylic tanks in multi-rack aquatic housing systems (Aquatic Habitats, Apopka, FL, USA). All tanks were supplied with well aerated dechloraminated City of Ottawa tap water at 28°C [for ion composition, refer to Perry and Vermette (Perry and Vermette, 1987)]. Fish were maintained under a 14h:10h light:dark cycle and spawning occurred daily at the beginning of the light cycle. To obtain embryos, breeder tanks (11; Aquatic Habitats) were placed in each 101 tank prior to spawning and collected after spawning had been allowed to proceed for at least 15 min. All experiments were performed in accordance with University of Ottawa animal care guidelines and with those of the Canadian Council on Animal Care (CCAC).

At the University of Innsbruck, adult zebrafish (Tübingen line) were housed in small aquaria at 28°C (Schwarz Aquarium Systems, Maschmühlenweg, Germany). Fish were maintained under a 14h:10h light:dark cycle and spawning occurred daily at the beginning of the light cycle. To obtain embryos, 8–10 random pairwise crossings were established at the beginning of the spawning period in 21 breeding tanks. Embryos were collected from each tank every 15–20 min and the clutches were pooled. These experiments were performed in accordance with the animal ethics permission GZ 66.008/4-BrGT/2004 of the Austrian Bundesministerium für Bildung, Wissenschaft und Kultur.

### Injection of $\beta$ -adrenergic receptor morpholinos

Antisense morpholino oligonucleotides (conjugated to the green fluorescent tag carboxyfluorescein) were designed to block translation of  $\beta$ 1AR,  $\beta$ 2aAR or  $\beta$ 2bAR and are described in Table 1. For all experiments, an injection volume of approximately 1 nl per embryo was used. Embryos were injected at the one cell

Table 1. List of primer sets and morpholino sequences used in the present study

|                                | GenBank accession no. | Forward primer sequence (5'–3') | Reverse primer sequence (5'–3') | Product size (bp) | Efficiency (%) | $R^2$ |
|--------------------------------|-----------------------|---------------------------------|---------------------------------|-------------------|----------------|-------|
| dTomato plasmid*               |                       |                                 |                                 |                   |                |       |
| $\beta$ 1AR                    | XM_680208.2           | TGAGCAAGGGCGAGGAGG              | TTACTTGTACAGCTCGTCCATG          |                   |                |       |
| $\beta$ 2aAR                   | XR_029238.1           | GTGAGCAAGGGCGAG                 | Same                            |                   |                |       |
| $\beta$ 2bAR                   | XM_695628.3           | TGAGCAAGGGCGAGGAGG              | Same                            |                   |                |       |
| Cell culture amplicon†         |                       |                                 |                                 |                   |                |       |
| $\beta$ 1AR                    |                       | ATGAACGCGCTTCTTTTCTC            | GCGTAAAGTAAAACCCGAAGTG          | 1468              |                |       |
| $\beta$ 2aAR                   |                       | CTGTCAGGTCATGGGAAACA            | TTGAGTGTGCTAGCCTTTTTGA          | 1454              |                |       |
| $\beta$ 2bAR                   |                       | AAGCTCATGGAGGGAGACAA            | CGGTTGTAAGTTGGGACATTT           | 1551              |                |       |
| <i>In situ</i> probe synthesis |                       |                                 |                                 |                   |                |       |
| $\beta$ 1AR                    |                       | CAGAGGCTCCAGACGCTCAC            | GACATCCTGCCGTTTCTCTC            | 983               |                |       |
| $\beta$ 2aAR                   |                       | CTAATGCCTCCACAAAAGC             | GAAGGCAGAGTTTGCGTACC            | 896               |                |       |
| $\beta$ 2bAR                   |                       | GGAGGGAGACAATACGCTGA            | TTCCCATTTTTGTTTTGGTG            | 1200              |                |       |
| Real-time PCR                  |                       |                                 |                                 |                   |                |       |
| $\beta$ 1AR                    |                       | GGGTTACTGGTGGTGCCATT            | GCGTGACGCAAAGTACATC             | 110               | 96.2           | 0.989 |
| $\beta$ 2aAR                   |                       | GCTTCAGCGTCTTCAGAAC             | CCGAAAGGAATCACTACCAA            | 91                | 89.4           | 0.989 |
| $\beta$ 2bAR                   |                       | CTCGTTCTACCCATCCACA             | ATGACCAGCGGGATGTAGAA            | 150               | 103.0          | 0.991 |
| 18S‡                           | N/A                   | GGCGGCGTTATTCATGACC             | GGTGGTGCCCTCCGTCAATTC           | 117               | 98.3           | 0.997 |
| Morpholino sequence (5'–3')    |                       |                                 |                                 |                   |                |       |
| $\beta$ 1AR                    |                       | ACGGTAGCCCGTCTCCCATGATTTG       |                                 |                   |                |       |
| $\beta$ 2aAR                   |                       | GTATTGAGGACCTTATGTTCCCAT        |                                 |                   |                |       |
| $\beta$ 2bAR                   |                       | GATCAGCGTATTGTCTCCCTCCATG       |                                 |                   |                |       |
| Control                        |                       | CCTTTACCTCAGTTACAATTTATA        |                                 |                   |                |       |

Data are given for zebrafish  $\beta$ -adrenergic receptor (AR) sequences 1, 2a and 2b.

\*Corresponding morpholino sequence added to 5' end of the forward primer.

†*Bam*HI restriction sequence added to 5' end of forward primers, *Not*I restriction sequence added to 5' end of reverse primer.

‡18S primer sequences as per Esbaugh et al., 2009.

developmental stage (approximately 15–30 min post-fertilization) for all morpholino experiments. All working stocks of morpholino were diluted prior to injection in  $1\times$  Danieau buffer [ $58\text{ mmol l}^{-1}$  NaCl,  $0.7\text{ mmol l}^{-1}$  KCl,  $0.4\text{ mmol l}^{-1}$   $\text{MgSO}_4$ ,  $0.6\text{ mmol l}^{-1}$   $\text{Ca}(\text{NO}_3)_2$ ,  $5.0\text{ mmol l}^{-1}$  Hepes (pH 7.6)] and 0.05% Phenol Red (for visualization of the injection volume). Working concentrations of the morpholino solutions were  $4\text{ ng nl}^{-1}$  for single knockdown of  $\beta 1\text{AR}$  and  $\beta 2\text{aAR}$ , and  $3\text{ ng nl}^{-1}$  for  $\beta 2\text{bAR}$ . For dual knockdowns, a working concentration of either 8 or  $7\text{ ng nl}^{-1}$  was created by combining these concentrations. Matching concentrations of a standard control morpholino (for sequence, see Table 1; Gene Tools, LLC, Philomath, OR, USA) were used in both the single and dual knockdown experiments. Injections were performed using either a Narishige IM 300 Microinjector system in Ottawa (Narishige International USA Inc., Long Island, NY, USA) or a pneumatic picopump (World Precision Instruments, Berlin, Germany) in Innsbruck. After injection, embryos were placed in 30 ml Petri dishes containing E3 medium with 0.03% Ethylene Blue and incubated at  $28^\circ\text{C}$ .

To test for the sequence binding specificity of the  $\beta 1\text{AR}$ ,  $\beta 2\text{aAR}$  and  $\beta 2\text{bAR}$  morpholinos, *in vitro*-synthesized fusion constructs were made in which the  $\beta 1\text{AR}$ ,  $\beta 2\text{aAR}$  and  $\beta 2\text{bAR}$  morpholino target sequences were separately introduced upstream of and in frame with the red fluorescent protein dTomato (Shaner et al., 2004) coding sequence. Each of these constructs was cloned in the forward direction into a pCS2+ expression vector. Constructs were then amplified from these plasmids by PCR using SP6 and T3 primers (IDT, Coralville, IA, USA), run on a 0.8% native agarose gel, and purified by gel extraction (Sigma-Aldrich Inc., St Louis, MO, USA). Capped mRNAs were synthesized from each purified PCR product using a mMESAGE mMACHINE<sup>®</sup> RNA transcription kit (AM1340; Ambion Inc., Austin, TX, USA) as per the manufacturer's protocol. Embryos were injected at the one cell stage with each dTomato mRNA construct individually ( $100\text{ pg nl}^{-1}$ ) or together with the corresponding morpholino ( $4\text{ ng nl}^{-1}$ ). To test for cross-reactivity of the  $\beta 2$  morpholinos, co-injections were also performed with the  $\beta 2\text{aAR}$  morpholino/ $\beta 2\text{bAR}$  dTomato mRNA, and *vice versa*.

#### Heart rate measurements – University of Ottawa

For baseline heart rate measurements, 4 d.p.f. larvae were placed individually in a small volume of  $100\text{ mg l}^{-1}$  Tris-buffered MS-222 (ethyl-3-aminobenzoate methanesulfonate salt, Sigma-Aldrich Inc.) at  $28^\circ\text{C}$ . After 3 min, the heart rate was measured by observing the embryo under a dissecting microscope and counting heart beats for 30 s. Each larva was then placed in a fresh solution also containing  $100\text{ mg l}^{-1}$  MS-222, with  $10^{-4}\text{ mol l}^{-1}$  adrenaline (general adrenergic receptor agonist),  $10^{-4}\text{ mol l}^{-1}$  isoproterenol ( $\beta\text{AR}$  agonist),  $10^{-4}\text{ mol l}^{-1}$  procaterol ( $\beta 2\text{AR}$  agonist) or  $10^{-4}\text{ mol l}^{-1}$  propranolol ( $\beta\text{AR}$  antagonist). These concentrations were chosen after trials with other concentrations to determine the dose required to produce the heart rate effects, and are in keeping with concentrations used in other studies on zebrafish larvae (e.g. Schwerte et al., 2006; Steele et al., 2009). After 10 min of exposure to these chemicals, heart rate was measured again. Heart rates in  $\beta 1/\beta 2\text{aAR}$  and  $\beta 1/\beta 2\text{bAR}$  morphants (Fig. 6) were acquired this way; all other heart rates were measured as described below.

#### Heart rate, stroke volume and cardiac output measurements – University of Innsbruck

Larvae (4 d.p.f.) were individually anaesthetized in  $100\text{ mg l}^{-1}$  Tris-buffered MS-222 at  $28^\circ\text{C}$ . Once immobilized, larvae were embedded

in a small volume of 2% low melting point agarose prepared with  $100\text{ mg l}^{-1}$  MS-222. The animal was then covered in 1 ml of  $100\text{ mg l}^{-1}$  MS-222 and placed on the temperature-controlled stage ( $28^\circ\text{C}$ ) of an inverted microscope (Zeiss Axiovert 25, Zeiss, Vienna, Austria). A digital high speed video camera (Basler A504k, Basler, Ahrensburg, Germany) attached to the microscope and connected to a personal computer captured images of the larval ventricle (dimensions of  $240\times 240$  pixels,  $30\text{ frames s}^{-1}$ ) under 40-fold magnification. Images from larvae were acquired for approximately 1 min prior to the addition of drugs to the surrounding media to obtain baseline (i.e. anaesthetized) values for heart rate, stroke volume and cardiac output. A  $1\text{ }\mu\text{l}$  sample of a  $10^{-1}\text{ mol l}^{-1}$  solution of adrenaline, isoproterenol, procaterol or propranolol was added to the 1 ml of solution bathing the larva and gently mixed to create a final concentration of  $10^{-4}\text{ mol l}^{-1}$  for each treatment. After 10 min, images from each larval ventricle were acquired for 1 min to obtain the treatment values. Heart rate, stroke volume and cardiac output were measured/calculated from the captured images as per Kopp et al. (Kopp et al., 2007).

#### Tissue collection – adults, embryos and larvae

All adult tissues (muscle, brain, liver, gut, heart, kidney, eye and gill) and pooled samples of larvae [from 1 h post-fertilization (h.p.f.) to 10 d.p.f.] were collected and stored prior to analysis as per Steele et al. (Steele et al., 2009).

#### RNA extraction, cDNA synthesis and real-time PCR

All RNA extraction and cDNA synthesis were performed as described by Steele et al. (Steele et al., 2009). Briefly, total RNA was extracted from tissue and larvae samples using TRIzol reagent (Invitrogen, Carlsbad, CA, USA) as per the manufacturer's protocol. cDNA was synthesized from  $2\text{ }\mu\text{g}$  of total RNA using RevertAid Maloney's murine leukaemia virus reverse transcriptase (Fermentas International Inc., Burlington, ON, Canada). For the current study, Brilliant II<sup>™</sup> SYBR Green Master Mix (Stratagene, Santa Clara, CA, USA) was used for all real-time PCR reactions. Otherwise, all real-time PCR (including standard curve validation and data analysis) was performed as per Steele et al. (Steele et al., 2009).

#### Whole-mount *in situ* hybridization

PCR products for  $\beta 1\text{AR}$ ,  $\beta 2\text{aAR}$  and  $\beta 2\text{bAR}$  were amplified from adult heart cDNA using the primers listed in Table 1. From these PCR products, *in situ* RNA probes were developed as per Steele et al. (Steele et al., 2009). All larvae were reared and fixed, and *in situ* hybridization performed as per Steele et al. (Steele et al., 2009).

#### Synthesis of expression constructs

Full-length coding regions for  $\beta 1\text{AR}$ ,  $\beta 2\text{aAR}$  and  $\beta 2\text{bAR}$  were amplified from adult zebrafish heart cDNA using the primers listed in Table 1. All PCR products were run on a 0.8% native agarose gel and gel purified using a GenElute gel extraction kit (Sigma). Gel-purified PCR products were ligated into pDrive cloning vector according to the manufacturer's instructions (cat. no. 231122; Qiagen Inc., Valencia, CA, USA). Several positive clones from each group were selected and sequenced to confirm orientation and correct reproduction of each sequence. One clone was then selected from each group and digested with *Bam*HI and *Not*I restriction enzymes according to the manufacturer's protocols (Invitrogen). Gel-purified restriction products were subsequently ligated into pcDNA3 expression vector (Invitrogen) also digested with *Bam*HI and *Not*I to ensure proper ligation of the insert in the forward direction.

Ligation was performed with T4 DNA ligase according to the manufacturer's protocol (Fermentas International Inc.). Each ligation was transformed into subcloning efficiency DH5 $\alpha$  cells (Invitrogen) and incubated on agar plates containing 50  $\mu\text{g ml}^{-1}$  ampicillin. Positive colonies were grown overnight at 37°C in 150 ml of LB media containing 50  $\mu\text{g ml}^{-1}$  ampicillin. Plasmid DNA was purified from the resulting culture using a HiSpeed Plasmid Midi kit (cat. no. 12643; Qiagen Inc.) according to the manufacturer's protocol. Human  $\beta 1\text{AR}$  (*EcoRI*) and  $\beta 2\text{AR}$  (*EcoRI* and *SalI*) in the CMV-based expression vector pRK5 (Lattion et al., 1999) were generously provided by Dr Susanna Cotecchia (University of Lausanne, Switzerland).

#### Cell culture and transfection

Human embryonic kidney 293 (HEK293) cells (CRL-1573; American Type Culture Collection, Manassas, VA, USA) seeded in 100 mm dishes were grown in minimal essential medium (MEM; Invitrogen) with 10% heat-inactivated fetal bovine serum (FBS; PAA Laboratories Inc., Etobicoke, ON, Canada) and gentamicin (10  $\mu\text{g ml}^{-1}$ ; Invitrogen) at 37°C in a humidified 5% CO<sub>2</sub> environment. Cells (2.5  $\times 10^6$  cells dish<sup>-1</sup>) were transiently transfected with human (h $\beta 1\text{AR}$ , h $\beta 2\text{AR}$ ) and zebrafish (z $\beta 1\text{AR}$ , z $\beta 2\text{aAR}$ , z $\beta 2\text{bAR}$ ) receptors with a total of 5  $\mu\text{g}$  DNA per 100 mm dish using a modified calcium phosphate procedure (Tumova et al., 2004). For radioligand binding studies, 5  $\mu\text{g}$  of receptor plasmid DNA were employed per transfection dish. For whole-cell cAMP studies, empty pCMV5 vector was added to normalize the total amount of DNA to 5  $\mu\text{g}$  per 100 mm dish as the quantity of receptor DNA required to obtain submaximal receptor expression was less than 5  $\mu\text{g}$ . HEK293 cells used in experiments were from 40 to 50 passages.

#### Crude membrane preparation

Transfected HEK293 cells were washed with phosphate-buffered saline (PBS), trypsinized, pooled into 150 mm dishes and incubated at 37°C in a 5% CO<sub>2</sub> environment for ~48 h prior to radioligand saturation studies. Crude membrane preparations from cells grown in 150 mm dishes were prepared by centrifugation washes as previously described (D'Aoust and Tiberi, 2010). Final pellets were homogenized using a Brinkman Polytron for 15 s in 3 ml of cold resuspension buffer (62.5 mmol l<sup>-1</sup> Tris-HCl pH 7.4, 1.25 mmol l<sup>-1</sup> EDTA pH 8.0). A fraction of membrane preparations (0.6 ml) was used immediately for saturation studies and the remaining homogenates were frozen in liquid nitrogen, and stored at -80°C until used for competition studies.

#### Radioligand binding assays

Binding reactions were carried out with 100  $\mu\text{l}$  of membrane preparations and 50  $\mu\text{l}$  of [<sup>3</sup>H]dihydroalprenolol (DHA, 97–102 Ci mmol<sup>-1</sup>; where 1 Ci  $\approx 3.7 \times 10^{10}$  Bq; Perkin-Elmer, Boston, MA, USA) in the absence or presence of 'cold' competing drugs in a total volume of 500  $\mu\text{l}$  of assay buffer (final in assays: 50 mmol l<sup>-1</sup> Tris-HCl pH 7.4, 120 mmol l<sup>-1</sup> NaCl, 5 mmol l<sup>-1</sup> KCl, 4 mmol l<sup>-1</sup> MgCl<sub>2</sub>, 1.5 mmol l<sup>-1</sup> CaCl<sub>2</sub>, 1 mmol l<sup>-1</sup> EDTA pH 8.0) at 20°C for 1 h. For saturation studies, fresh membrane preparations were incubated with increasing concentrations of [<sup>3</sup>H]DHA (0.005–5 nmol l<sup>-1</sup> for h $\beta 2\text{AR}$  and z $\beta 2\text{bAR}$ ; 0.05–25 nmol l<sup>-1</sup> for h $\beta 1\text{AR}$ , z $\beta 1\text{AR}$  and z $\beta 2\text{aAR}$ ) in the absence or presence of 1  $\mu\text{mol l}^{-1}$  alprenolol hydrochloride (cat. no. A8676) to delineate total and non-specific binding, respectively. For competition studies, frozen membranes were thawed on ice and incubated with 50  $\mu\text{l}$  [<sup>3</sup>H]DHA (~0.5 nmol l<sup>-1</sup> for h $\beta 2\text{AR}$  and z $\beta 2\text{bAR}$ ;

~2.5 nmol l<sup>-1</sup> for h $\beta 1\text{AR}$ , z $\beta 1\text{AR}$  and z $\beta 2\text{aAR}$ ) and increasing concentrations of competing ligands dissolved in double distilled water [dobutamine hydrochloride (cat. no. D0676), final concentration in assays 0.1–1000  $\mu\text{mol l}^{-1}$ ; (-)-adrenaline (+)-bitartrate salt (cat. no. E4395), final concentration in assays 0.1–1000  $\mu\text{mol l}^{-1}$ ; (R)-(-)-isoproterenol (cat. no. 286303), final concentration in assays 0.1–100  $\mu\text{mol l}^{-1}$ ; ( $\pm$ )-noradrenaline (+)-bitartrate salt (cat. no. A0937), final concentration in assays 0.1–1000  $\mu\text{mol l}^{-1}$ ; (R)-(-)-phenylephrine (cat. no. P6126), final concentration in assays 0.1–1000  $\mu\text{mol l}^{-1}$ ; procaterol hydrochloride (cat. no. P9180), final concentration in assays 0.1–1000  $\mu\text{mol l}^{-1}$ ]. Drugs were from Sigma-Aldrich. Binding reactions were stopped by rapid filtration through glass fibre filters (GF/C, Whatman, Piscataway, NJ, USA) and bound radioactivity was quantified by liquid scintillation counting (Beckman Counter, LS6500). Protein concentrations were measured using the Bio-Rad assay kit (Bio-Rad Laboratories Inc., Mississauga, ON, Canada) with bovine serum albumin (BSA) as standard. Binding curves were analysed using the non-linear curve-fitting program GraphPad Prism version 5.03 for Windows (GraphPad Software, San Diego, CA, USA) to calculate the equilibrium dissociation constant ( $K_d$ , nmol l<sup>-1</sup>) and maximal binding capacity ( $B_{\text{max}}$ , pmol mg<sup>-1</sup> of membrane proteins) of [<sup>3</sup>H]DHA (saturation studies), and the equilibrium dissociation constant of unlabelled adrenergic drugs ( $K_i$ , nmol l<sup>-1</sup>) at [<sup>3</sup>H]DHA-labelled receptors (competition studies). Affinity ratios were calculated by dividing the ligand affinity of z $\beta 1\text{AR}$  and z $\beta 2\text{AR}$  by that measured with the same ligand at h $\beta 1\text{AR}$  and h $\beta 2\text{AR}$ , respectively. Affinities measured with different ligands at h $\beta 2\text{AR}$  and z $\beta 2\text{AR}$  were divided by the corresponding ligand affinity of h $\beta 1\text{AR}$  and z $\beta 1\text{AR}$ , respectively.

#### Whole-cell cAMP assays

Transfected HEK293 cells were seeded in 12-well plates and cultured in MEM with 10% FBS (v/v) and gentamicin (10  $\mu\text{g ml}^{-1}$ ) for 24 h. The medium was then removed and cells were cultured in labelling MEM containing 5% FBS (v/v), gentamicin (10  $\mu\text{g ml}^{-1}$ ) and [<sup>3</sup>H]adenine (1  $\mu\text{Ci ml}^{-1}$ ) overnight. The next day, labelling medium was aspirated and cells were incubated with 1 ml of 20 mmol l<sup>-1</sup> Hepes-buffered MEM containing 1 mmol l<sup>-1</sup> isobutylmethylxanthine (phosphodiesterase inhibitor; Sigma-Aldrich) in the absence [0.1% (v/v) ethanol] or presence of adrenergic drugs dissolved in double-distilled water (final in assays: 100  $\mu\text{mol l}^{-1}$  adrenaline, 1  $\mu\text{mol l}^{-1}$  procaterol) or ethanol [final in assays: 10  $\mu\text{mol l}^{-1}$  (S)-(-)-propranolol hydrochloride; Sigma-Aldrich] at 37°C for 30 min. Following the incubation period, plates were put on ice, medium was aspirated and 1 ml of lysis solution [2.5% (v/v) perchloric acid, 0.1 mmol l<sup>-1</sup> cAMP and [<sup>14</sup>C]cAMP (~3.3 nCi, 9000–11,000 d.p.m.)] was added to each well. Cells were lysed for 30 min at 4°C and lysates were transferred to tubes containing 0.1 ml of a neutralizing solution (4.2 mol l<sup>-1</sup> KOH), vortexed and clarified using low-speed centrifugation (500 g, 15 min) at 4°C. [<sup>3</sup>H]cAMP in supernatants was purified by sequential chromatography columns using Dowex AG 50W-4X resin (Bio-Rad Laboratories Inc.) and alumina N Super I (MP Biomedicals Canada, Montréal, Québec, Canada) as previously described (Johnson et al., 1994). [<sup>3</sup>H]cAMP levels (CA) divided by the total amount of intracellular [<sup>3</sup>H]adenine uptake (TU) was calculated and used as a relative index of adenylyl cyclase activity (expressed as CA/TU  $\times 1000$ ). Receptor expression ( $B_{\text{max}}$ ) was determined using a saturating concentration of [<sup>3</sup>H]DHA on fresh membranes prepared from one 100 mm dish of cells as described above.

Table 2. Stroke volume and cardiac output of 4 d.p.f. zebrafish β-adrenergic receptor or control morphants before (MS-222) and after exposure to the adrenergic agonists adrenaline, isoproterenol and procaterol or the antagonist propranolol

|                      | Control     | β1                      | Control    | β2a                     | Control    | β2b        | Control    | β2a/β2b                 |
|----------------------|-------------|-------------------------|------------|-------------------------|------------|------------|------------|-------------------------|
| MS-222–adrenaline    |             |                         |            |                         |            |            |            |                         |
| SV                   | 0.23±0.02   | 0.21±0.03               | 0.28±0.03  | 0.23±0.02 <sup>†</sup>  | 0.21±0.01  | 0.22±0.01  | 0.18±0.01  | 0.19±0.02               |
| CO                   | 51.25±3.31  | 42.84±5.52              | 61.91±6.28 | 49.30±5.31 <sup>†</sup> | 46.31±2.88 | 48.11±3.31 | 36.36±2.35 | 44.04±4.34 <sup>†</sup> |
| Adrenaline           |             |                         |            |                         |            |            |            |                         |
| SV                   | 0.23±0.02   | 0.21±0.02               | 0.28±0.03  | 0.23±0.02               | 0.18±0.02  | 0.23±0.02  | 0.18±0.01  | 0.23±0.03               |
| CO                   | 51.77±4.57  | 43.70±4.65              | 65.65±6.18 | 51.57±4.27              | 41.69±5.32 | 52.91±5.58 | 37.26±3.29 | 51.28±7.71              |
| MS-222–isoproterenol |             |                         |            |                         |            |            |            |                         |
| SV                   | 0.23±0.01   | 0.19±0.02               | 0.21±0.02  | 0.20±0.02               | 0.19±0.02  | 0.21±0.02  | 0.24±0.02  | 0.26±0.01               |
| CO                   | 49.11±2.48  | 36.05±2.59              | 44.61±4.50 | 43.57±4.00              | 40.77±4.23 | 45.06±3.79 | 50.64±4.71 | 58.19±3.86              |
| Isoproterenol        |             |                         |            |                         |            |            |            |                         |
| SV                   | 0.22±0.02   | 0.19±0.02               | 0.22±0.02  | 0.21±0.02               | 0.20±0.01  | 0.24±0.02  | 0.24±0.02  | 0.28±0.01               |
| CO                   | 47.27±3.98  | 39.02±4.23              | 47.81±4.06 | 46.98±4.47              | 44.32±2.90 | 53.53±4.05 | 52.38±4.54 | 65.19±3.24*             |
| MS-222–procaterol    |             |                         |            |                         |            |            |            |                         |
| SV                   | 0.18±0.01   | 0.19±0.01               | 0.23±0.01  | 0.25±0.02               | 0.23±0.01  | 0.26±0.02  |            |                         |
| CO                   | 36.40±1.71  | 34.75±2.90              | 46.87±2.94 | 50.81±4.69              | 46.87±2.94 | 55.20±3.21 |            |                         |
| Procaterol           |             |                         |            |                         |            |            |            |                         |
| SV                   | 0.19±0.02   | 0.22±0.02               | 0.21±0.02  | 0.30±0.02*              | 0.21±0.02  | 0.26±0.01  |            |                         |
| CO                   | 36.53±3.23  | 41.83±4.74              | 41.52±3.36 | 61.60±3.91*             | 41.52±3.36 | 54.64±1.87 |            |                         |
| MS-222–propranolol   |             |                         |            |                         |            |            |            |                         |
| SV                   | 0.25±0.02   | 0.21±0.02               | 0.13±0.02  | 0.24±0.02 <sup>†</sup>  | 0.22±0.02  | 0.21±0.01  | 0.20±0.02  | 0.20±0.02               |
| CO                   | 50.91±4.62  | 41.07±4.24 <sup>†</sup> | 26.28±3.51 | 49.68±3.88 <sup>†</sup> | 46.42±3.68 | 47.96±3.45 | 40.36±4.07 | 43.07±4.77              |
| Propranolol          |             |                         |            |                         |            |            |            |                         |
| SV                   | 0.27±0.03   | 0.25±0.02               | 0.19±0.02* | 0.23±0.02               | 0.27±0.02* | 0.23±0.02  | 0.22±0.02  | 0.20±0.02               |
| CO                   | 43.12±4.42* | 33.72±3.00*             | 29.80±3.43 | 36.29±3.25*             | 42.26±3.05 | 42.50±4.29 | 35.57±3.28 | 36.12±3.65              |

Column headings indicate morphant type, row headings indicate treatment. CO, cardiac output (nl min<sup>-1</sup>); SV, stroke volume (nl beat<sup>-1</sup>). All agonists used were 1 × 10<sup>-4</sup> mol l<sup>-1</sup> and MS-222 concentration was 100 mg l<sup>-1</sup>.

\*Significant difference between same measurement within morphant group due to chemical exposure. <sup>†</sup>Significant difference between control and corresponding β-adrenergic receptor morphant (*P* < 0.05, *N* = 8–10).

**Statistical analyses**

All statistical analyses presented in Table 2 and Figs 1, 3, 4, 5 and 6 were performed using SigmaStat statistical analysis software (v. 3.5; Systat Software Inc., San Jose, CA, USA). In Table 2 and Figs 5 and 6, all comparisons between control (MS-222 treated only) and drug-treated (adrenergic ligand in MS-222 solution) fish within morphant groups were made using Student’s paired *t*-test. All comparisons between morphant groups within the MS-222 treatment (i.e. control) were made using Student’s unpaired *t*-test. Real-time PCR data in Figs 1, 3 and 4 were compared using a one-way ANOVA on ranks (because of failure of normality and equal variance test) with a Tukey *post hoc* test.

Statistics for geometric (*K<sub>d</sub>* and *K<sub>i</sub>*) and arithmetic (*B<sub>max</sub>*) means with the 95% lower and upper confidence intervals were used to report binding values (Tables 3 and 4). Arithmetic means (±standard error) were calculated to describe all other data in Figs 8 and 9. Student’s one-sample and unpaired *t*-test and one-way ANOVA (followed by Newman–Keuls *post hoc* test) were used to perform the statistical analysis presented in Tables 3 and 4 and Figs 8 and 9. Statistical tests were performed using GraphPad Prism version 5.03 for Windows. All statistical analyses were two-sided and performed with a level of significance established at *P* < 0.05.

**RESULTS**

**Developmental and adult tissue mRNA expression of β1AR, β2aAR and β2bAR**

The mRNA expression of β1AR was detectable as early as 1 h.p.f., had increased approximately 200-fold by 12 h.p.f. and at 6 and 8 d.p.f. was significantly higher than expression at 1 h.p.f. (Fig. 1A). The expression of β2aAR was detectable beginning at 6 h.p.f. and expression was significantly higher than at this early stage at 4, 8 and 10 d.p.f. (Fig. 1B). β2bAR expression was below detection levels

at 6 h.p.f., but at 8 d.p.f. expression levels were significantly higher than those at 1 h.p.f. (Fig. 1B). Using *in situ* hybridization, the expression of all three transcripts in 3 d.p.f. larvae was compared. β1AR, β2aAR and β2bAR mRNA all appeared to be expressed in the heart region (arrows, Fig. 2), and also in different regions of the brain (Fig. 2). When comparing adult tissue mRNA, all three transcripts were expressed in the heart. β1AR expression was highest in the brain and heart (Fig. 3A), β2aAR was highest in the gill (Fig. 3B), while β2bAR expression was not significantly different from that in the liver in any tissue (Fig. 3C). The expression of β1AR was higher than that of β2bAR in the eye, gill, brain, heart and kidney, while it was significantly lower in the muscle (Fig. 4). β2aAR expression was lower than β2bAR expression in the liver, whereas both β1AR and β2aAR expression were lower than β2bAR expression in the gut (Fig. 4).

**βAR morphants – general observations**

β1AR morphants showed no observable physical abnormalities when compared with control morphant fish. In general, β1AR knockdown larvae had significantly lower heart rates than control larvae. β2aAR morphants were also physically similar to control morphants in all experiments. In one experiment (adrenaline), cardiac output was significantly lower in β2aAR morphants *versus* controls, whereas in another experiment (propranolol), cardiac output was significantly higher (Table 2).

Some percentage of every β2bAR morpholino-injected clutch (10–50%) had a phenotype different from control morphants. This phenotype generally presented itself as a curled body often accompanied by an enlarged pericardial cavity. Because of the differences in body shape, which could lead to changes in blood flow, and in particular the enlarged pericardial cavity, which can affect the proper function of the heart, only β2bAR morphants that

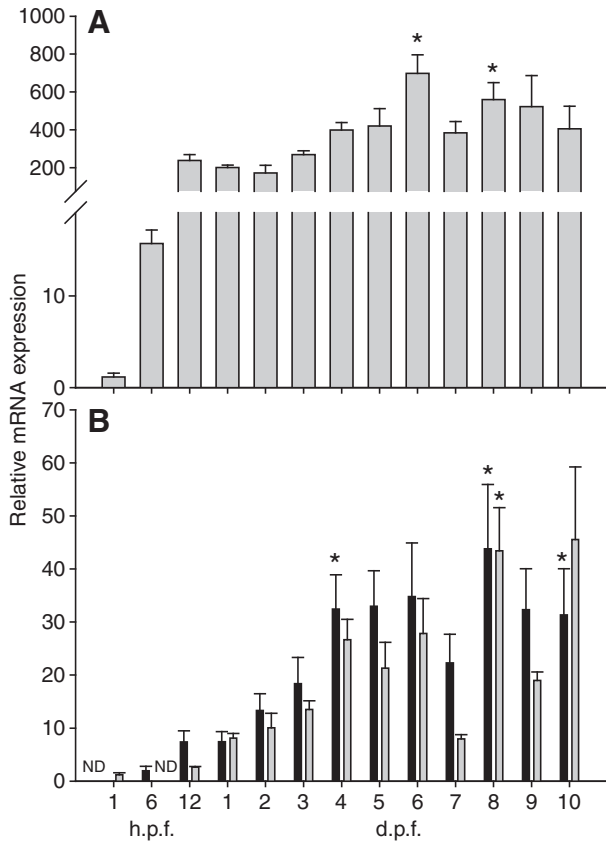

Fig. 1. mRNA expression of the  $\beta$ -adrenergic receptor genes  $\beta 1AR$  (A),  $\beta 2aAR$  (black bars; B) and  $\beta 2bAR$  (grey bars; B) in zebrafish larvae at 1, 6 and 12 h post-fertilization (h.p.f.) and 1–10 days post-fertilization (d.p.f.). Expression of each gene of interest is standardized to 18S ribosomal RNA expression and is shown relative to its own level of expression at 1 h.p.f. (for  $\beta 1AR$  and  $\beta 2bAR$ ) or 6 h.p.f. (for  $\beta 2aAR$ ). ND, not detectable. \*Significant difference from own expression level at 1 h.p.f. (for  $\beta 1AR$  and  $\beta 2bAR$ ) or 6 h.p.f. (for  $\beta 2aAR$ ). Values are means + s.e.,  $N=4$ .

appeared physically similar to control morphants were used in these experiments. In two out of four experiments,  $\beta 2bAR$  morphants had significantly higher heart rates than control morphants (Fig. 5).

Dual  $\beta 2AR$  morphant larvae had consistently higher heart rates than control morphants in every experiment conducted (Fig. 6). These morphants also occasionally had the  $\beta 2bAR$  morphant phenotype described above, although it was not as common in the dual  $\beta 2AR$  morphants (and these fish were not used in subsequent experiments).

#### $\beta AR$ morphants – drug treatments

Treatment of 4 d.p.f. control morphants with  $10^{-4}$  mol l $^{-1}$  adrenaline caused a significant increase in heart rate in all experiments (Figs 5 and 6). Adrenaline ( $\beta AR$  agonist) also caused a significant increase in heart rate in  $\beta 2bAR$  and  $\beta 1/\beta 2aAR$  morphants, but not in any of the other  $\beta AR$  morphant groups (Figs 5 and 6). Stroke volume and cardiac output were not affected by adrenaline exposure in any of the morphants tested (Table 2). Isoproterenol ( $\beta AR$  agonist) exposure caused a significant increase in heart rate in all control groups (Figs 5 and 6). It also caused a significant increase in cardiac output in the dual  $\beta 2a/\beta 2bAR$  morphants (Table 2). Procaterol ( $\beta 2AR$  agonist) exposure caused a significant decrease in heart rate in two out of five groups of control morphants, and a

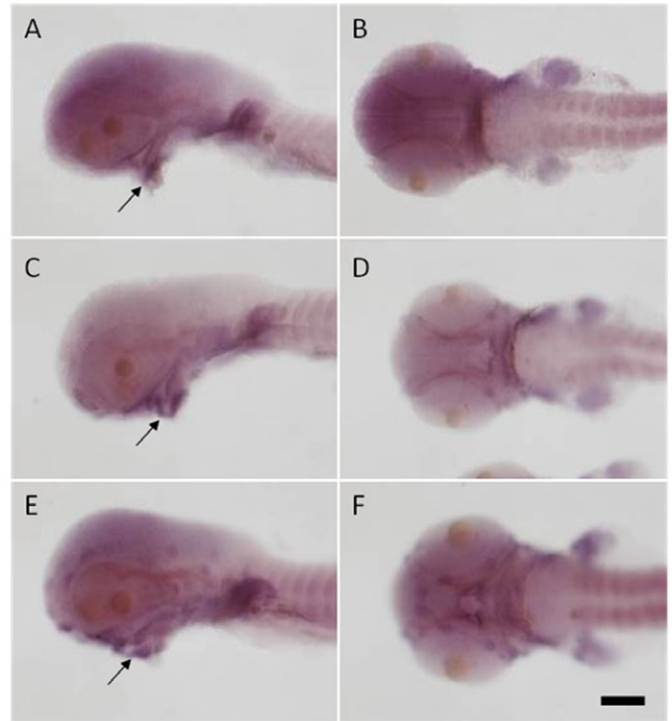

Fig. 2. *In situ* hybridization of  $\beta 1AR$  (A,B),  $\beta 2aAR$  (C,D) and  $\beta 2bAR$  (E,F) in 3 d.p.f. larval zebrafish. Pictures on the right (A,C,E) are lateral views and those on the left (B,D,F) are ventral. Yolk sacs have been removed from larvae. Heart region is indicated by arrows. Bar, 250  $\mu$ m.

significant decrease in heart rate in  $\beta 1/\beta 2aAR$  and  $\beta 1/\beta 2bAR$  morphants (Fig. 6). Procaterol had the greatest overall effect on  $\beta 2aAR$  morphants, in which heart rate, stroke volume and cardiac output were all significantly higher upon exposure to the drug (Fig. 5; Table 2). Propranolol ( $\beta AR$  antagonist) caused highly significant decreases in heart rate in all control morphants and every  $\beta AR$  morphant group examined (Figs 5 and 6). Two out of four groups of control morphants showed a significant increase in stroke volume as a result of propranolol exposure, and one control group showed a significant increase in cardiac output (Table 2).  $\beta 1AR$  and  $\beta 2aAR$  morphants also had significantly lower cardiac output during propranolol exposure (Table 2).

#### Morpholino controls – dTomato red fluorescent protein

Similar results were found in all experiments testing the efficacy of the  $\beta 1AR$ ,  $\beta 2aAR$  and  $\beta 2bAR$  morpholinos in blocking dTomato protein synthesis; therefore, only the results of the  $\beta 2bAR$  experiment are presented here, as an example (Fig. 7). Injection of the morpholino sequence-tagged dTomato capped mRNAs alone caused the 4 d.p.f. larvae to express the red fluorescent protein in all three cases (e.g. Fig. 7). Co-injection of each of the capped mRNAs with its corresponding morpholino consistently blocked the production of the dTomato protein in all three cases, as demonstrated by the lack of red fluorescence in these fish (e.g. Fig. 7), suggesting that the morpholinos were binding specifically to their antisense sequence tagged to the 5' end of the dTomato mRNA and thereby blocking the production of this protein (and therefore presumably the production of their native adrenergic receptor proteins). To test for cross-reactivity of the two  $\beta 2AR$  morpholinos, each morpholino was injected with the dTomato mRNA of the opposite  $\beta 2AR$ . As

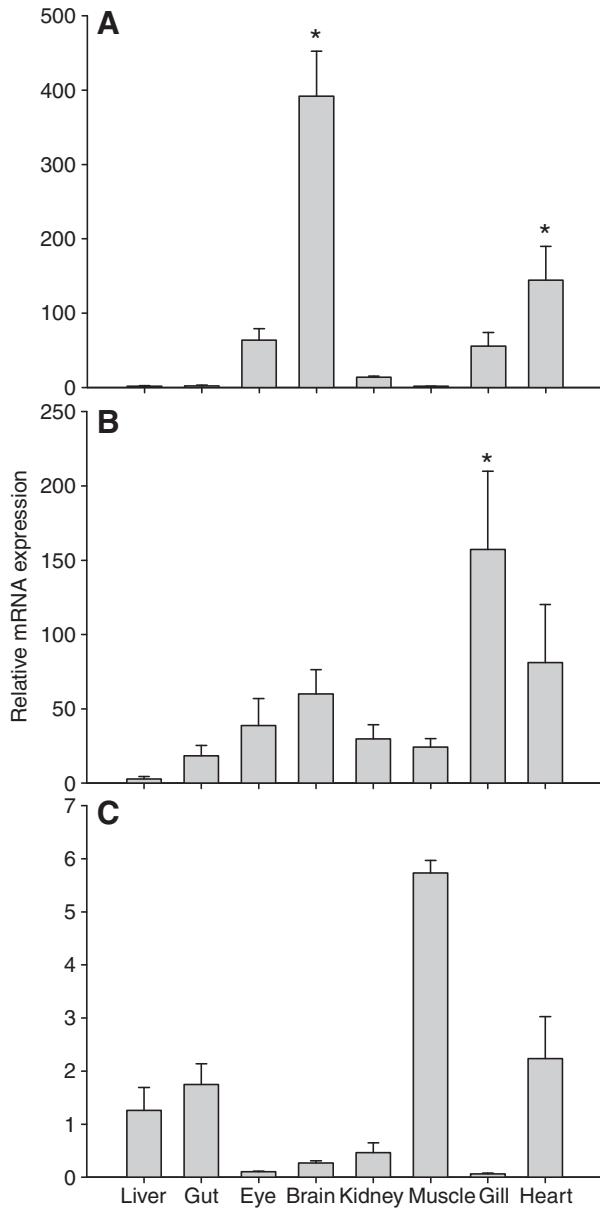

Fig. 3. Relative mRNA expression of β1AR (A), β2aAR (B) and β2bAR (C) in various adult zebrafish tissues. All values are standardized to 18S ribosomal RNA expression and the level in each tissue is expressed relative to mRNA expression in the liver within each gene of interest. \*Significant difference from the level of expression in the liver within each gene of interest ( $P < 0.05$ ). Values are means + s.e.,  $N = 4$ .

seen in Fig. 7D, injecting the β2aAR morpholino with the β2bAR dTomato mRNA did not block the synthesis of the red fluorescent protein. The same result was seen for the β2aAR dTomato protein/β2bAR morpholino combination, suggesting both β2AR morpholinos are efficiently binding to their own gene targets.

#### Zebrafish βAR ligand binding properties

To gain insight into the pharmacological properties of zebrafish adrenergic receptors, transfected HEK293 cells, a common cellular model for G-protein-coupled receptors, were used (Thomas and Smart, 2005). Notably, HEK293 cells express very low levels of endogenous human β-adrenergic receptors (Fig. 10). Equilibrium dissociation constants ( $K_d$ ) and maximal binding capacity ( $B_{max}$ ) of

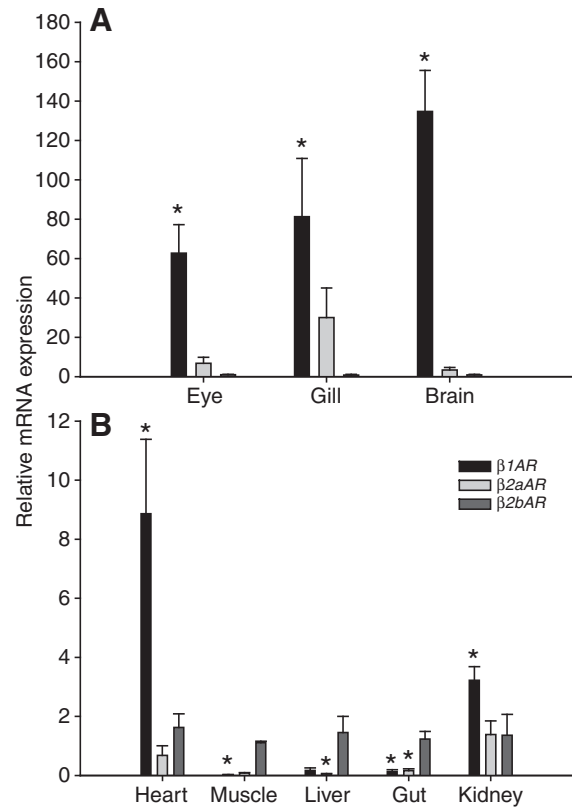

Fig. 4. Relative mRNA expression of β1AR, β2aAR and β2bAR in adult zebrafish eye, gill and brain (A), and heart, muscle, liver, gut and kidney (B). All values are standardized to 18S ribosomal RNA expression and are expressed relative to β2bAR mRNA expression in the specified tissue. \*Significant difference from the level of expression of β2bAR within each tissue ( $P < 0.05$ ). Values are means + s.e.,  $N = 4$ .

the non-selective β-adrenergic radioligand [<sup>3</sup>H]DHA in HEK293 cell membranes expressing human and zebrafish β-adrenergic receptors are reported in Table 3. Representative saturation and competitive binding curves (for zfβ2bAR) are provided in Fig. 8. The hβ1AR and hβ2AR were expressed at  $B_{max}$  values in HEK293 cells using transfection conditions leading to maximal expression in this cellular system ( $5 \mu\text{g dish}^{-1}$ ). Interestingly, zfβ2aAR exhibited lower  $B_{max}$  values than hβ2AR and zfβ2bAR. Likewise, zfβ1AR was expressed at significantly lower levels than hβ1AR. Importantly, the lower  $B_{max}$  of zfβ1AR and zfβ2aAR is not explained by their lower  $K_d$  for [<sup>3</sup>H]DHA as these values are indistinguishable from  $K_d$  of hβ1AR, which had a higher  $B_{max}$  than either zfβ1AR or zfβ2aAR. Moreover, it is unlikely that  $B_{max}$  values measured here are linked to differences in receptor transfection efficiency in HEK293 cells. Indeed, it has previously been shown that transfection efficiency in HEK293 cells is similar regardless of the receptor expression construct used (Tumova et al., 2003). Alternatively, these data potentially suggest that zfβ1AR and zfβ2aAR have distinct determinates regulating their optimal folding and trafficking conformations in HEK293 cells relative to human adrenergic receptors and zfβ2bAR. Additionally, these data demonstrated that zebrafish β-adrenergic receptors bound to [<sup>3</sup>H]DHA with high affinity. However, zfβ2aAR displayed a ~3-fold lower affinity for [<sup>3</sup>H]DHA in comparison with hβ2AR. The selectivity ratio of hβ2AR over hβ1AR was ~3-fold, a value that was recapitulated when comparing zfβ2bAR and zfβ1AR. Interestingly, no [<sup>3</sup>H]DHA

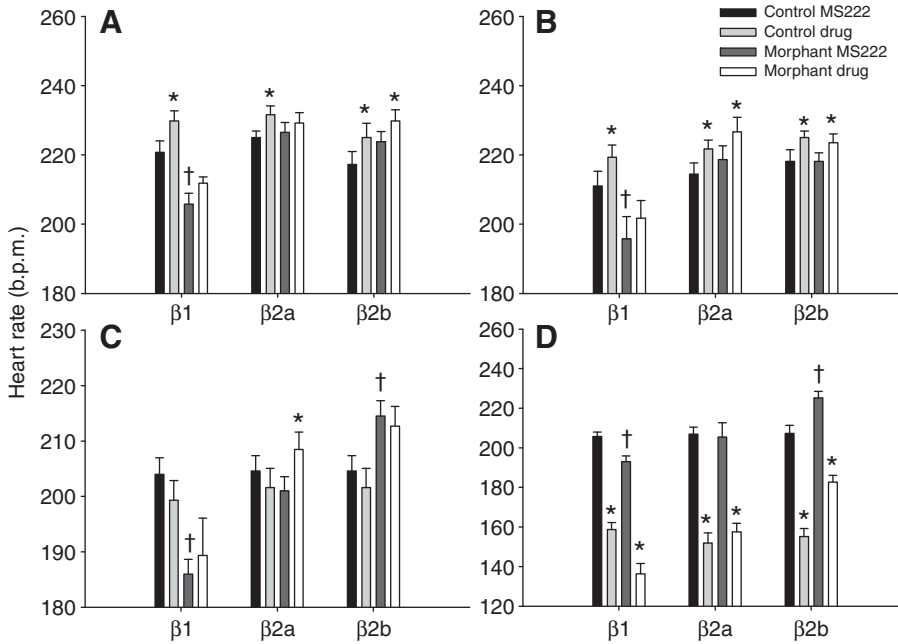

Fig. 5. Heart rates of  $\beta$ 1AR,  $\beta$ 2aAR and  $\beta$ 2bAR knockdown larvae (morphants) exposed to  $10^{-4} \text{ mol l}^{-1}$  adrenaline (A), isoproterenol (B), procaterol (C) and propranolol (D). Control fish were injected with a standard control morpholino. MS-222 indicates heart rate of larvae when anaesthetized only, prior to drug exposure. \*Significant difference between MS-222- and drug-treated fish within morphant group. †Significant difference between control and morphant fish in MS-222 ( $P < 0.05$ ,  $N = 8-10$ ). Note: scale of y-axis in D differs from the scale used in A-C.

selectivity was observed between  $z\beta$ 1AR and  $z\beta$ 2bAR. Overall, differences in affinity and selectivity of  $K_d$  values for [ $^3\text{H}$ ]DHA potentially suggest differences between ligand binding properties of human and zebrafish adrenergic receptors. This idea was further tested using competition studies with a wider range of adrenergic compounds.

Inhibitory constants ( $K_i$ ) for different ligands (adrenaline, noradrenaline, isoproterenol, procaterol, phenylephrine and dobutamine) are shown in Table 4 along with affinity and selectivity ratios for these compounds (Fig. 9). While  $K_i$  values of adrenaline, noradrenaline and procaterol were essentially not different between  $z\beta$ 1AR and  $h\beta$ 1AR, affinities of other synthetic adrenergic drugs (isoproterenol, phenylephrine and dobutamine) were differed

significantly between these two receptors (Table 4, Fig. 9). Additionally, ligand affinities were all significantly different between  $z\beta$ 2aAR and  $h\beta$ 2AR. With the exception of adrenaline and procaterol, which had similar  $K_i$  values for  $z\beta$ 2bAR and  $h\beta$ 2AR, other tested drugs displayed significant differences in their affinity for human and zebrafish  $\beta$ 2-adrenergic receptors. Notably, procaterol, a selective  $\beta$ 2-adrenergic receptor agonist, had a  $\sim 10$ -fold lower affinity for  $z\beta$ 2aAR relative to  $h\beta$ 2AR (Fig. 9). Altogether, the affinity and selectivity of adrenergic drugs suggest that  $z\beta$ 1AR and  $z\beta$ 2bAR are zebrafish orthologues of  $h\beta$ 1AR and  $h\beta$ 2AR, respectively. Meanwhile,  $z\beta$ 2aAR may represent another zebrafish  $\beta$ 2-adrenergic receptor isoform with distinct pharmacological properties (Table 4, Fig. 9E). Indeed,  $z\beta$ 2aAR

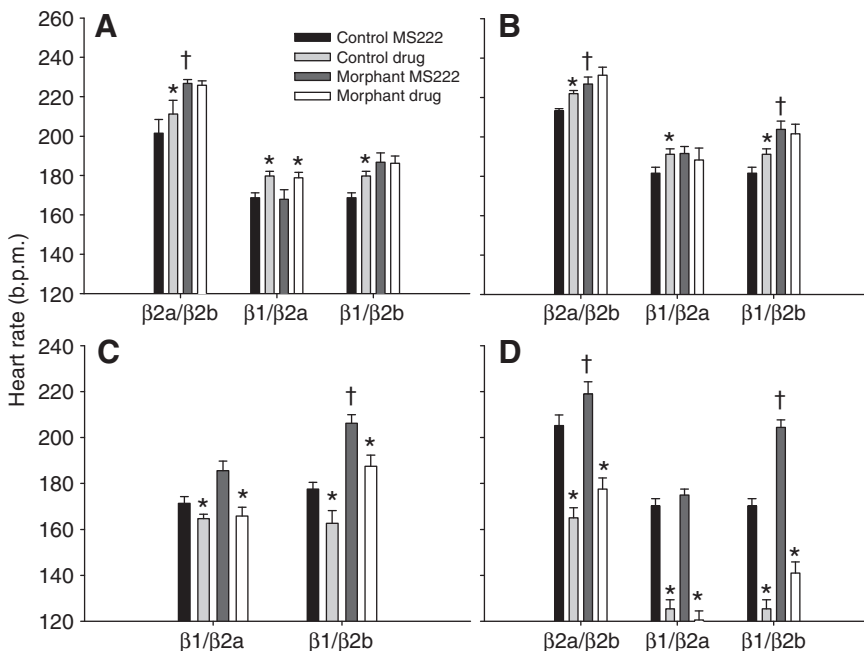

Fig. 6. Heart rates of dual  $\beta$ 2a/ $\beta$ 2bAR,  $\beta$ 1/ $\beta$ 2aAR and  $\beta$ 1/ $\beta$ 2bAR knockdown larvae (morphants) exposed to  $10^{-4} \text{ mol l}^{-1}$  adrenaline (A), isoproterenol (B), procaterol (C) and propranolol (D). Control fish were injected with a standard control morpholino. MS-222 indicates heart rate of larvae when anaesthetized only, prior to drug exposure. \*Significant difference between MS-222- and drug-treated fish within morphant group. †Significant difference between control and morphant fish in MS-222 ( $P < 0.05$ ,  $N = 8-10$ ).



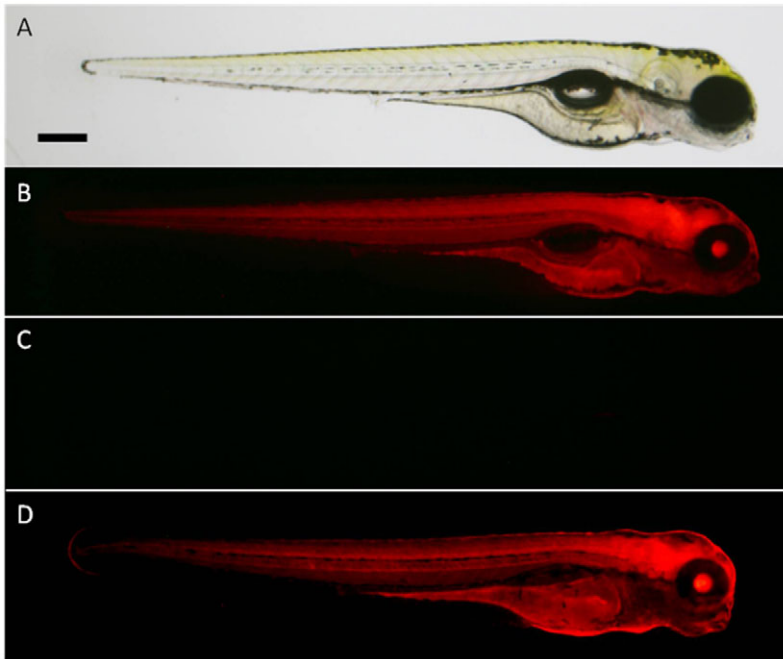

Fig. 7. Lateral images of zebrafish larvae at 4 d.p.f. after being injected with a red fluorescent dTomato capped mRNA (100 pg) tagged with the β2bAR morpholino sequence, alone or in conjunction with β2bAR or β2aAR morpholinos (4 ng, see Materials and methods). (A) Representative bright field image of a 4 d.p.f. injected larva. (B) Red fluorescent image of a β2bAR dTomato-injected larva. (C) Red fluorescent image of β2bAR dTomato plus β2bAR morpholino-injected larva. (D) Red fluorescent image of a β2bAR dTomato plus β2aAR morpholino-injected larva. Bar, 250 μm.

strikingly displayed higher affinity for the α1-adrenergic receptor agonist phenylephrine when compared with hβ2AR and zfβ2bAR. Overall, while ligand  $K_d$  and  $K_i$  values suggest that zfβ1AR, zfβ2aAR and zfβ2bAR behave pharmacologically as β-adrenergic receptors, the distinct drug selectivity points to important functional differences in the binding mechanisms and ligand discrimination of human and zebrafish β1- and β2-adrenergic receptors.

**Zebrafish βAR G<sub>s</sub> coupling properties**

The ability of different zebrafish β-adrenergic receptors expressed at similar levels to stimulate adenylyl cyclase activity was tested using adrenaline and procaterol. Adrenaline (100 μmol l<sup>-1</sup>) robustly stimulated adenylyl cyclase activity in HEK293 cells overexpressing human and zebrafish β1ARs and β2ARs (~10-fold over basal) in comparison to mock-transfected cells (~2-fold over basal). In contrast to cells transfected with hβ2AR, procaterol (1 μmol l<sup>-1</sup>) partially stimulated adenylyl cyclase activity in HEK293 cells expressing hβ1AR relative to adrenaline exposure. Interestingly, procaterol behaved as a full agonist in cells expressing zfβ1AR (Fig. 10C). In agreement with the idea that zfβ2bAR is the zebrafish orthologue of hβ2AR, procaterol evoked a strong and weak stimulation of adenylyl cyclase activity in HEK293 cells expressing zfβ2bAR and zfβ2aAR, respectively. The lower intrinsic activity of procaterol relative to adrenaline in cells transfected with zfβ2aAR may be explained by the lower procaterol affinity for zfβ2aAR in comparison to zfβ2bAR and hβ2AR. Propranolol did not produce detectable adenylyl cyclase activation in cells expressing human or zebrafish adrenergic receptors

(Fig. 10). Collectively, these whole-cell cAMP studies suggest that zebrafish β-adrenergic receptors exhibit differences in procaterol-mediated adenylyl cyclase activation.

**DISCUSSION**

The results of the present study show that β1AR has a stimulatory role in the zebrafish heart, and that the two β2AR subtypes have unique cardioinhibitory roles *in vivo*. Wang and colleagues also noted a similar trend in zebrafish β1AR morphants, reporting a significant reduction in heart rate at 3 and 4 d.p.f. but not at 2 and 5 d.p.f. (Wang et al., 2009). Comparatively, in β1AR<sup>-/-</sup> mice, heart rate was as much as 25% lower than in wild-types (Ecker et al., 2006). These data conform to the widely accepted canon that β1ARs are stimulatory in *in vivo* systems. It is interesting to note that knocking down β1AR together with either β2aAR or β2bAR did not cause a significant decrease in heart rate in zebrafish (Fig. 6). This is in contrast to mice, where β1AR<sup>-/-</sup>β2AR<sup>-/-</sup> knockouts have significantly lower heart rates than wild-types in anaesthetized (Rohrer et al., 1999) or waking (Ecker et al., 2006) animals. These differences could be attributed to species-specific differences in β1AR signalling, or to the activity of other adrenergic receptor subtypes in the heart (see below).

Morpholino knockdown of β2aAR had no effect on heart rate; however, stroke volume and cardiac output both increased significantly in one experiment but decreased significantly in another, a phenomenon which is not explainable using the current data set (Table 2). β2bAR appears to play a more significant role in the regulation of heart rate *in vivo* in these larvae. Loss of function of

Table 3.  $K_d$  and  $B_{max}$  values of [<sup>3</sup>H]DHA in membranes from HEK293 cells expressing human (h) and zebrafish (zf) β-adrenergic receptors

|                                    | hβ1AR            | zfβ1AR            | hβ2AR            | zfβ2aAR           | zfβ2bAR           |
|------------------------------------|------------------|-------------------|------------------|-------------------|-------------------|
| $K_d$ (nmol l <sup>-1</sup> )      | 1.24 (0.84–1.82) | 1.05 (0.78–1.42)  | 0.49 (0.28–0.84) | 1.25* (0.84–1.86) | 0.47† (0.26–0.85) |
| $B_{max}$ (pmol mg <sup>-1</sup> ) | 27.0 (23.9–30.1) | 4.36‡ (3.73–4.99) | 20.0 (18.6–21.6) | 1.64* (1.18–2.10) | 16.1† (14.4–17.8) |

Saturation curves (N=6) were individually analysed using GraphPad Prism version 5.03. Equilibrium dissociation constant ( $K_d$ , nmol l<sup>-1</sup>) and maximal binding capacity ( $B_{max}$ , pmol mg<sup>-1</sup> membrane protein) values for [<sup>3</sup>H]DHA are expressed as geometric and arithmetic means, respectively. The 95% lower and upper confidence intervals are shown in parentheses.

Statistical analysis was performed using one-way ANOVA followed by Newman–Keuls *post hoc* test. † $P < 0.05$  when compared with human (h)β1AR; \* $P < 0.05$  when compared with hβ2AR; ‡ $P < 0.05$  when compared with zebrafish (zf)β2aAR.

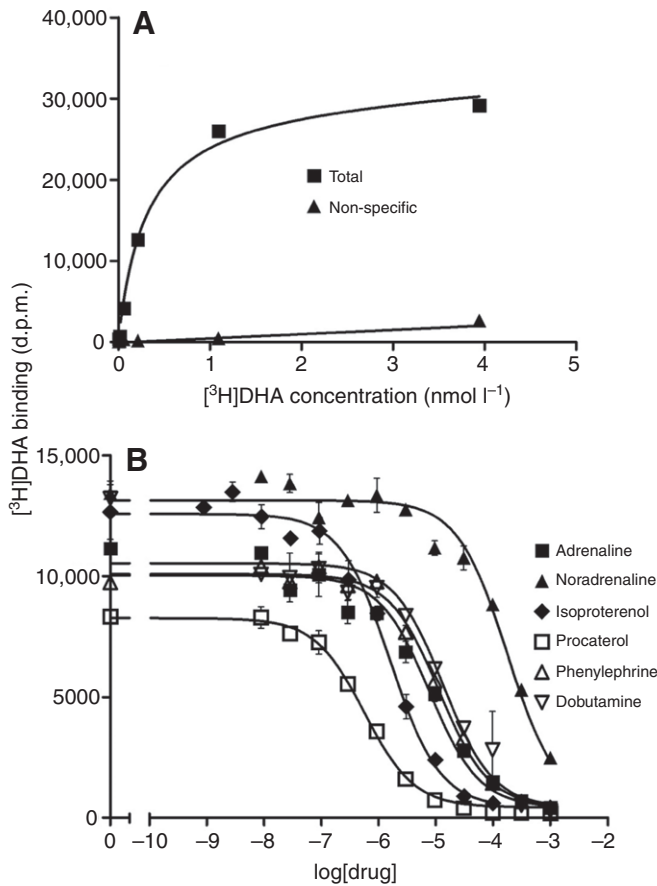

Fig. 8. Saturation (A) and competitive (B) curves for HEK293 cells transfected with zebrafish  $\beta 2bAR$  (chosen as representatives for curves generating data for Tables 3 and 4). Saturation curves of  $[^3H]DHA$  were determined in the presence of  $1 \mu mol l^{-1}$  alprenolol. Competitive curves for zebrafish  $\beta 2bAR$ -transfected cells were performed with  $0.5 nmol l^{-1}$   $[^3H]DHA$  (for others, see Results). Ligand concentration ( $mol l^{-1}$ ) is given as log values.

$\beta 2bAR$  alone caused a significant increase in heart rate in 2 out of 3 experiments presented (Fig. 5). When knocked down in conjunction with either  $\beta 2aAR$  or  $\beta 1AR$ ,  $\beta 2bAR$  loss of function caused an even more robust and reproducible increase in heart rate (Fig. 6). This was despite the fact that  $\beta 2aAR$  is more highly expressed than  $\beta 2bAR$  in the zebrafish heart (Wang et al., 2009) (present study, Fig. 3). One possible explanation for this phenomenon is that while  $\beta 1$  and  $\beta 2$  adrenergic receptors are generally the most plentiful  $\beta$ -adrenergic receptor found in the heart, they are not the only G-protein-coupled receptor that can affect heart rate. The  $\beta 3AR$  subtype plays a minimal but not insignificant role in cardiovascular function in most species studied. Both isoproterenol and the  $\beta 3AR$ -specific agonist CL-316243 cause a brief decrease in the rate of contraction in myocytes cultured from  $\beta 1AR/\beta 2AR^{-/-}$  mice (Devic et al., 2001). Likewise,  $\beta 3AR$ s in the heart of the freshwater eel exert negative inotropic effects by linking with pertussis toxin-sensitive (presumably  $G_{i/o}$ ) proteins (Imbrogno et al., 2006).  $\beta 3AR$ s have also been found in the heart of rainbow trout (Nickerson et al., 2003) and possibly winter flounder (Mendonça and Gamperl, 2009). While rainbow trout appear to express  $\beta 3aAR$  mRNA in the heart (Nickerson et al., 2003), Wang and colleagues reported minimal to non-existent expression of  $\beta 3aAR$  or  $\beta 3bAR$  mRNA anywhere but in the blood of adult zebrafish (Wang et al., 2009). It is therefore unlikely that these  $\beta 3AR$ s play a

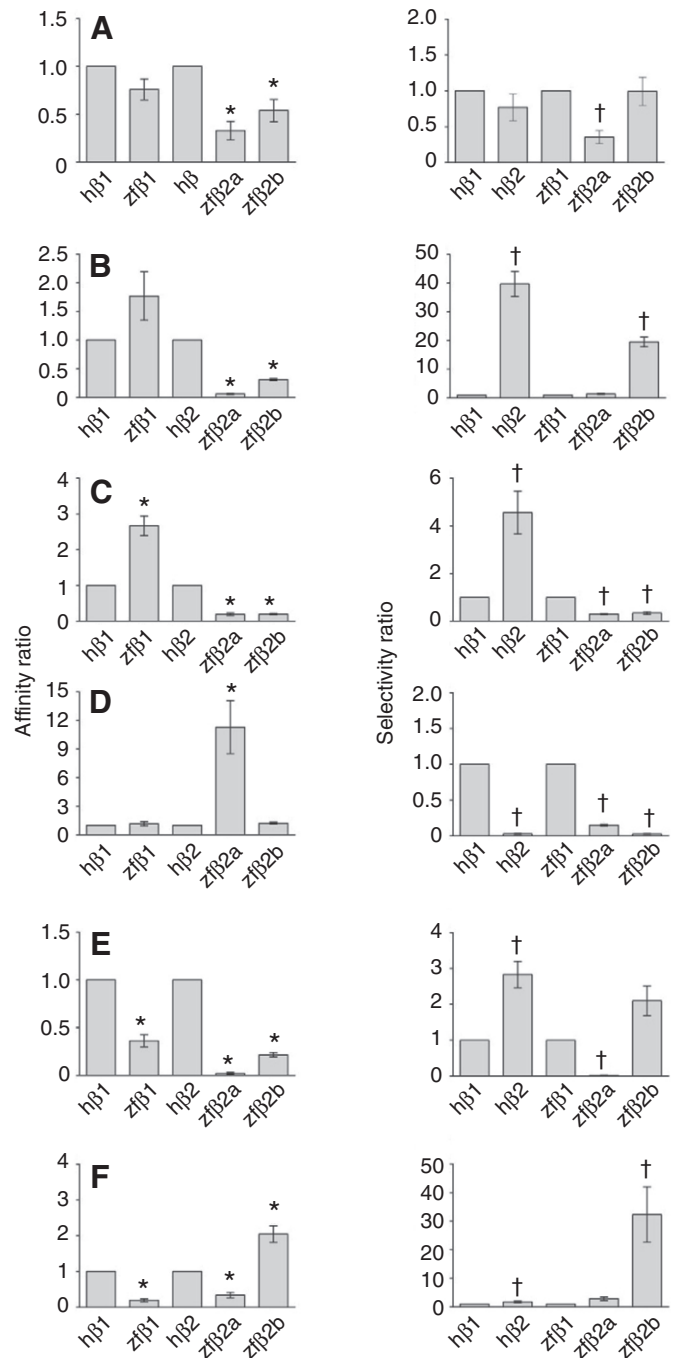

Fig. 9. Ligand affinity (left) and selectivity (right) ratios for human and zebrafish  $\beta$ -adrenergic receptors expressed in HEK293 cells. (A) Adrenaline, (B) noradrenaline, (C) isoproterenol, (D) procaterol, (E) phenylephrine and (F) dobutamine. Affinity ratios for zebrafish (zf) $\beta 1AR$  and  $z\beta 2AR$  (a and b isoforms) were calculated relative to human (h) $\beta 1AR$  and  $h\beta 2AR$ , respectively. Selectivity ratios for  $h\beta 2AR$  and  $z\beta 2AR$  (a and b isoforms) were computed relative to  $h\beta 1AR$  and  $z\beta 1AR$ , respectively. \* $P < 0.05$  when compared with a value of 1 (affinity ratio). † $P < 0.05$  when compared with a value of 1 (selectivity ratio).

significant role in regulating heart rate in the  $\beta 2AR$  morphants of the current study; however, the present data cannot entirely rule out the possibility.

The present *in vivo* findings led us to hypothesize that one or both of the zebrafish  $\beta 2AR$ s has a negative chronotropic role in

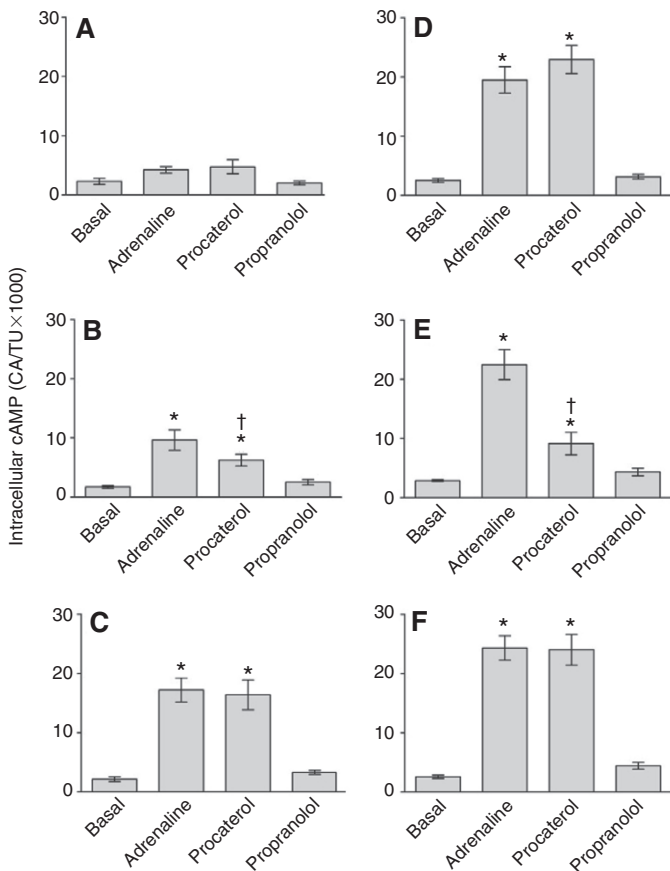

Fig. 10. Drug-mediated adenylyl cyclase activity [expressed as [<sup>3</sup>H]cAMP levels (CA) over the total amount of intracellular [<sup>3</sup>H]adenine uptake (TU)] in HEK293 cells expressing human (h) and zebrafish (zf) β-adrenergic receptors. Arithmetic means ± s.e. of raw data (N=5–8) are reported. \*P<0.05 when compared with basal condition and †P<0.05 when compared with adrenaline condition. (A) Mock-transfected cells, (B) hβ1AR, (C) zβ1AR, (D) hβ2AR, (E) zβ2aAR and (F) zβ2bAR. Maximal binding capacity (B<sub>max</sub>) values (in pmol mg<sup>-1</sup> protein) were as follows: mock transfected, 0.09±0.03; hβ1AR, 3.00±1.01; zβ1AR, 4.63±2.12; hβ2AR, 3.49±0.66; zβ2aAR, 2.94±0.80; and zβ2bAR, 2.95±0.44. Drug concentrations were as follows: adrenaline, 100 μmol l<sup>-1</sup>; procaterol, 1 μmol l<sup>-1</sup>; and propranolol, 10 μmol l<sup>-1</sup>. All significant differences were maintained when cAMP accumulation in βAR-transfected cells was corrected for accumulation in mock-transfected cells as shown in A (data not shown).

the zebrafish heart, because of associations with G<sub>i</sub> proteins and/or differences in their association with G<sub>s</sub> proteins as compared with other βARs. Therefore, cell culture experiments in which each of

the zebrafish (and human) βARs were expressed in HEK293 cells were used to determine the effect of various agonists on intracellular cAMP accumulation. Data obtained in HEK293 cells are important as they are the first to demonstrate that the zebrafish β1 and β2 adrenergic receptor proteins behave like those previously described in other species, in that they associate with G<sub>s</sub> proteins. However, these results by themselves do not help rationalize the increase in heart rate seen in dual β2AR zebrafish morphants. Many factors including subcellular localization (e.g. caveolae) (Rybin et al., 2000), changes in conformation, dual coupling to G<sub>s</sub> and G<sub>i</sub> proteins, and agonist-mediated internalization of the receptor can all play a role in how β2AR affects different cell signalling pathways (for reviews, see Xiao et al., 2003; Zheng et al., 2004).

Stimulation of mammalian β1 and β2 adrenergic receptors increases intracellular cAMP in cardiomyocytes (Freyss-Beguín et al., 1983; Kuschel et al., 1999). Despite this, β2AR activation does not appear to increase cAMP-dependent protein kinase A (PKA) activity in normal canine (Kuschel et al., 1999) or murine (Devic et al., 2001) cardiomyocytes, nor does it increase phosphorylation of proteins involved in the excitation–contraction pathway of these cells (Kuschel et al., 1999). Regardless of this disassociation within the classic G<sub>s</sub>–cAMP/PKA pathway, it is obvious that β2AR signalling is involved in regulating chronotropic and inotropic activity of the heart, possibly mediated by its additional association with G<sub>i</sub> proteins. In support of this, the present study shows that loss of β2AR function *in vivo* causes increased heart rate in zebrafish larvae (Figs 5 and 6). Also, the stimulation of β2ARs by isoproterenol causes an initial increase in contraction rate followed by a sustained decrease in murine cardiomyocytes (Devic et al., 2001; Wang et al., 2008), suggesting some cardioinhibitory role for the receptor. This is further supported by the observation that disruption of G<sub>i</sub> activity by pertussis toxin (PTX) enhances the β2AR-mediated contractile response of murine (for reviews, see Xiao, 2001; Xiao et al., 2003) and canine (Kuschel et al., 1999) cardiomyocytes. Indeed, while the β2AR–G<sub>i</sub> complex does not seem to directly inhibit global cAMP production, it does seem to affect downstream PKA activity and also the association of β2ARs with G<sub>s</sub> proteins. For example, the β2AR–G<sub>i</sub> complex activates phosphoinositide 3-kinases (PI3Ks) which provide a cell survival effect for cardiomyocytes. When PI3K activity is blocked in isolated rat myocytes, β2AR stimulation causes a more robust positive contractile response without a concurrent overall increase in intracellular cAMP compared with when β2ARs are stimulated without blocking PI3K (Jo et al., 2002). Overall, therefore, the fact that cAMP levels are increased in HEK293 cells expressing β1AR and β2AR in the present study does not negate the possibility that β2AR–G<sub>i</sub> associations limit the contractile response of the heart, as is suggested by the present *in vivo* data.

Table 4. K<sub>i</sub> values of unlabelled drugs in membranes from HEK293 cells expressing human (h) and zebrafish (zf) β-adrenergic receptors

|        | Adrenaline                   | Noradrenaline                    | Isoproterenol              | Procaterol                 | Dobutamine                     | Phenylephrine                  |
|--------|------------------------------|----------------------------------|----------------------------|----------------------------|--------------------------------|--------------------------------|
| hβ1AR  | 1924 (1303–2842)             | 1258 (744–2043)                  | 74.9 (49.6–113)            | 7025 (4869–10137)          | 1296 (923–1821)                | 7580 (5060–11356)              |
| zβ1AR  | 1394 (1189–1634)             | 1977 (1492–2620)                 | 207 (169–254) <sup>‡</sup> | 9066 (6309–13026)          | 193 (110–338) <sup>‡</sup>     | 2562 (1813–3619) <sup>‡</sup>  |
| hβ2AR  | 1376 (590–3210)              | 55911 (25691–121679)             | 478 (160–1424)             | 156 (93.4–257)             | 2172 (1183–3985)               | 20837 (8883–48882)             |
| zβ2aAR | 481 (234–991)*               | 2717 (1837–4020)*                | 66.3 (49.1–89.4)*          | 1214 (718–2053)*           | 715 (470–1088)*                | 115 (23.7–561)*                |
| zβ2bAR | 1076 (484–2396) <sup>†</sup> | 18277 (9445–35369)* <sup>†</sup> | 94.4 (30.9–289)*           | 162 (101–260) <sup>†</sup> | 4299 (2461–7510)* <sup>†</sup> | 4081 (2267–7346)* <sup>†</sup> |

Equilibrium dissociation constant (K<sub>i</sub>, nmol l<sup>-1</sup>) for different ligands expressed as geometric means with the 95% lower and upper confidence intervals shown in parentheses (N=4–6).

Statistical analysis was performed using Student's unpaired *t*-test to compare ligand affinity between hβ1AR and zβ1AR. One-way ANOVA followed by Newman–Keuls *post hoc* test was used to compare hβ2AR, zβ2aAR and zβ2bAR. <sup>‡</sup>P<0.05 when compared with hβ1AR; \*P<0.05 when compared with hβ2AR; <sup>†</sup>P<0.05 when compared with zβ2aAR.

This is the first study to examine the ligand binding affinities and cellular activity of the zebrafish  $\beta 1$  and  $\beta 2$  adrenergic receptors. The first result of note is that the zebrafish  $\beta 1$ AR had a similar binding affinity profile for the endogenous ligands adrenaline and noradrenaline when compared with the human  $\beta 1$ AR. The zebrafish protein, however, had a lower binding affinity for isoproterenol and a higher affinity for dobutamine and phenylephrine than h $\beta 1$ AR (Table 4). This finding is in keeping with previous observations that fish receptors can have different receptor binding properties from those expected based on mammalian data (Janssens and Grigg, 1988; Fabbri et al., 1992). Perhaps the most interesting outcome of the competitive binding experiments is the obvious difference in binding affinities between the two zebrafish  $\beta 2$ ARs, with  $\beta 2a$ AR having the greatest divergence in binding profile from that of human  $\beta 2$ AR (Table 4). Each of the zebrafish  $\beta 2$ ARs had unique mRNA expression profiles in adult tissues (Fig. 3B,C). Also, the zebrafish  $\beta 2$ ARs had differential effects on heart rate when knocked down individually in zebrafish larvae, with the  $\beta 2b$ AR subtype potentially playing the more critical role at this stage (Figs 5 and 6).  $\beta 2a$ AR has been shown to be involved in pigment formation in the larval zebrafish (Wang et al., 2009). It would be interesting to further investigate the potential sub-function of each of these  $\beta 2$ ARs in zebrafish, both in the heart and in other tissues where  $\beta 2$ AR function is critical, such as the liver (e.g. Dugan et al., 2008).

Comparing the binding affinities of the different  $\beta$ AR agonists used in this study revealed some unexpected specificities of the  $\beta 1$  and  $\beta 2$  adrenergic receptors. Each of the  $\beta 2$ ARs (including the human receptor) had a high affinity for phenylephrine, a classic  $\alpha 1$ AR agonist (Table 3). Fabbri and colleagues showed that phenylephrine is as potent as noradrenaline and adrenaline at displacing [ $^3$ H]DHA binding in catfish liver membranes (Fabbri et al., 1992). Significant displacement of the  $\beta$ AR ligand [ $^{125}$ I]ICP by phenylephrine has also been demonstrated in liver membranes of *Xenopus laevis*, the Australian lungfish (*Neoceratodus forsteri*) and the axolotl (*Ambystoma mexicanum*) (Janssens and Grigg, 1988). Thus, there is a growing body of evidence that mammalian and non-mammalian adrenoceptors do not always conform to the same functional paradigms. The present data for cAMP activation in human and zebrafish  $\beta$ AR-transfected cells also highlight some of these differences. Adrenaline caused a robust increase in intracellular cAMP in whole HEK293 cells transfected with all five of the  $\beta$ ARs (Fig. 10), supporting similar findings in other studies, which show that activation of both  $\beta 1$  and  $\beta 2$  adrenergic receptors with adrenaline causes cellular cAMP accumulation (e.g. Green et al., 1992). Procaterol, a classic  $\beta 2$ AR agonist, also induced cAMP accumulation in both  $\beta 1$  and  $\beta 2$  adrenergic receptor-transfected cells; however, cAMP levels were significantly lower in the z $\beta 2a$ AR-transfected cells exposed to procaterol *versus* adrenaline (Fig. 10). These data suggest that procaterol (1) behaves as a strong partial or full agonist to human and zebrafish  $\beta 1$ ARs, respectively, and (2) is not as effective as the endogenous catecholamine adrenaline at increasing cAMP accumulation in z $\beta 2a$ AR-transfected cells. The current *in vivo* data show that in two control morphant groups, procaterol exposure caused a significant decrease in heart rate (Fig. 6), and a significant increase in heart rate in zebrafish experiencing  $\beta 2a$ AR knockdown (Fig. 5). Zebrafish lacking M<sub>2</sub> muscarinic receptor function also show a negative chronotropic response to procaterol (Steele et al., 2009). Considering the activity of the receptors in the present HEK293 experiments, it is possible that these effects are mediated by  $\beta 1$ AR,  $\beta 2$ ARs, or both receptor types. *In vitro* assessment of  $\beta 2$ AR agonist effects on rat

cardiomyocyte chronotropy suggests that some of these chemicals increase the rate of cell contraction *via* a  $\beta 1$ AR-mediated pathway (Freys-Beguín et al., 1983; Juberg et al., 1985). It would seem, therefore, that even mammalian  $\beta$ ARs do not always interact with synthetic ligands in a predictable fashion.

In conclusion, it appears that the  $\beta$ -adrenergic receptors are necessary for regulating heart function during early life in zebrafish, with  $\beta 1$ AR and  $\beta 2b$ AR being most strongly implicated in controlling heart rate. It is also apparent that while the zebrafish  $\beta$ -adrenergic receptors are equally capable of instigating cAMP production as their human counterparts, they have distinct binding affinities for different ligands. While morpholino knockdown of  $\beta 2a$ AR and  $\beta 2b$ AR suggests that one or both of these receptors may be cardioinhibitory, experiments expressing each of these receptors individually in HEK293 cells imply that stimulation of both  $\beta 2$ AR subtypes increases intracellular cAMP levels. The  $\beta 2$ ARs may cause inhibition by another indirect pathway, such as by interaction with other signalling cascades (e.g. PI3K) *via* an association with G<sub>i</sub> proteins. Further research into how these receptors behave at the cellular level in native tissues would be key in clarifying how these unique paralogues function.

#### ACKNOWLEDGEMENTS

The authors would like to thank Dr Dirk Meyer (Institute for Molecular Biology, Innsbruck, Austria) for the use of his zebrafish facilities. This study was supported by an operating grant (MOP-81341) from the Canadian Institutes of Health Research to M.T., an NSERC Discovery grant to S.F.P., and OGS and NSERC post-graduate scholarships to S.L.S.

#### REFERENCES

- Bagatto, B. (2005). Ontogeny of cardiovascular control in zebrafish (*Danio rerio*): effects of developmental environment. *Comp. Biochem. Physiol.* **141A**, 391-400.
- Bernstein, D. (2002). Cardiovascular and metabolic alterations in mice lacking  $\beta 1$ - and  $\beta 2$ -adrenergic receptors. *Trends Cardiovasc. Med.* **12**, 287-294.
- Brodde, O. E. (2008).  $\beta 1$ - and  $\beta 2$ -adrenoceptor polymorphisms: functional importance, impact on cardiovascular diseases and drug responses. *Pharmacol. Ther.* **117**, 1-29.
- Cavalli, A., Lattion, A.-L., Hummler, E., Nenniger, M., Pedrazzini, T., Aubert, J.-F., Michel, M. C., Yang, M., Lembo, G., Vecchione, C. et al. (1997). Decreased blood pressure response in mice deficient of the  $\alpha 1b$ -adrenergic receptor. *Proc. Natl. Acad. Sci. USA* **94**, 11589-11594.
- D'Aoust, J. P. and Tiberi, M. (2010). Role of the extracellular amino terminus and first membrane-spanning helix of dopamine D1 and D5 receptors in shaping ligand selectivity and efficacy. *Cell. Signal.* **22**, 106-116.
- Devic, E., Xiang, Y., Gould, D. and Kobilka, B. (2001).  $\beta$ -Adrenergic receptor subtype-specific signaling in cardiac myocytes from  $\beta 1$  and  $\beta 2$  adrenoceptor knockout mice. *Mol. Pharmacol.* **60**, 577-583.
- Dugan, S. G., Chen, X., Nickerson, J. G., Montpetit, C. J. and Moon, T. W. (2008). Regulation of the black bullhead hepatic beta-adrenoceptors. *Comp. Biochem. Physiol.* **149B**, 265-274.
- Ecker, P. M., Lin, C. C., Powers, J., Kobilka, B. K., Dubin, A. M. and Bernstein, D. (2006). Effect of targeted deletions of  $\beta 1$ - and  $\beta 2$ -adrenergic-receptor subtypes on heart rate variability. *Am. J. Physiol. Heart Circ. Physiol.* **290**, H192-H199.
- Esbaugh, A. J., Perry, S. F. and Gilmour, K. M. (2009). Hypoxia-inducible carbonic anhydrase IX expression is insufficient to alleviate intracellular metabolic acidosis in the muscle of zebrafish, *Danio rerio*. *Am. J. Physiol. Regul. Integr. Comp. Physiol.* **296**, R150-R160.
- Fabbri, E., Brighenti, L., Ottolenghi, C., Puviani, A. C. and Capuzzo, A. (1992).  $\beta$ -adrenergic receptors in catfish liver membranes: characterization and coupling to adenylate cyclase. *Gen. Comp. Endocrinol.* **85**, 254-260.
- Freys-Beguín, M., Griffaton, G., Lechat, P., Picken, D., Quenedey, M. C., Rouot, B. and Schwartz, J. (1983). Comparison of the chronotropic effect and the cyclic AMP accumulation induced by  $\beta 2$ -agonists in rat heart cell culture. *Br. J. Pharmacol.* **78**, 717-723.
- Green, S. A., Holt, B. D. and Liggett, S. B. (1992).  $\beta 1$ - and  $\beta 2$ -adrenergic receptors display subtype-selective coupling to Gs. *Mol. Pharmacol.* **41**, 889-893.
- Imbrogno, S., Angelone, T., Adamo, C., Pulera, E., Tota, B. and Cerra, M. C. (2006).  $\beta 3$ -adrenoceptor in the eel (*Anguilla anguilla*) heart: negative inotropy and NO-cGMP-dependent mechanism. *J. Exp. Biol.* **209**, 4966-4973.
- Janssens, P. A. and Grigg, J. A. (1988). Binding of adrenergic ligands to liver plasma membrane preparations from the axolotl, *Ambystoma mexicanum*; the toad, *Xenopus laevis*; and the Australian lungfish, *Neoceratodus forsteri*. *Gen. Comp. Endocrinol.* **71**, 524-530.
- Jo, S. H., Leblais, V., Wang, P. H., Crow, M. T. and Xiao, R. P. (2002). Phosphatidylinositol 3-kinase functionally compartmentalizes the concurrent Gs signaling during  $\beta 2$ -adrenergic stimulation. *Circ. Res.* **91**, 46-53.
- Johnson, R. A., Alvarez, R. and Salomon, Y. (1994). Determination of adenylyl cyclase catalytic activity using single and double column procedures. *Methods Enzymol.* **238**, 31-56.

- Juberg, E. N., Minneman, K. P. and Abel, P. W. (1985).  $\beta_1$ - and  $\beta_2$ -adrenoceptor binding and functional response in right and left atria of rat heart. *Naunyn Schmiedeberg's Arch. Pharmacol.* **330**, 193-202.
- Kawasaki, T., Saito, K., Deguchi, T., Fujimori, K., Tadokoro, M., Yuba, S., Ohgushi, H. and Kawarabayashi, Y. (2008). Pharmacological characterization of isoproterenol-treated medaka fish. *Pharmacol. Res.* **58**, 348-355.
- Kopp, R., Pelster, B. and Schwerte, T. (2007). How does blood cell concentration modulate cardiovascular parameters in developing zebrafish (*Danio rerio*)? *Comp. Biochem. Physiol.* **146A**, 400-407.
- Kuschel, M., Zhou, Y. Y., Spurgeon, H. A., Bartel, S., Karczewski, P., Zhang, S. J., Krause, E. G., Lakatta, E. G. and Xiao, R. P. (1999).  $\beta_2$ -Adrenergic cAMP signaling is uncoupled from phosphorylation of cytoplasmic proteins in canine heart. *Circulation* **99**, 2458-2465.
- Lands, A. M., Arnold, A., McAuliff, J. P., Luduena, F. P. and Brown, T. G., Jr (1967a). Differentiation of receptor systems activated by sympathomimetic amines. *Nature* **214**, 597-598.
- Lands, A. M., Luduena, F. P. and Buzzo, H. J. (1967b). Differentiation of receptors responsive to isoproterenol. *Life Sci.* **6**, 2241-2249.
- Lattion, A., Abuin, L., Nenniger-Tosato, M. and Cotecchia, S. (1999). Constitutively active mutants of the  $\beta_1$ -adrenoceptor. *FEBS Lett.* **457**, 302-306.
- Mendonça, P. C. and Gamperi, A. K. (2009). Nervous and humoral control of cardiac performance in the winter flounder (*Pleuronectes americanus*). *J. Exp. Biol.* **212**, 934-944.
- Nickerson, J. G., Dugan, S. G., Drouin, G. and Moon, T. W. (2001). A putative  $\beta_2$ -adrenoreceptor from the rainbow trout (*Oncorhynchus mykiss*): Molecular characterization and pharmacology. *Eur. J. Biochem.* **268**, 6465-6472.
- Nickerson, J. G., Dugan, S. G., Drouin, G., Perry, S. F. and Moon, T. W. (2003). Activity of the unique  $\beta$ -adrenoceptor  $\text{Na}^+/\text{H}^+$  exchanger in trout erythrocytes is controlled by a novel  $\beta_3$ -AR subtype. *Am. J. Physiol. Regul. Integr. Comp. Physiol.* **285**, R526-R535.
- Perry, S. F. and Vermette, M. G. (1987). The effects of prolonged epinephrine infusion on the physiology of the rainbow trout, *Salmo gairdneri*. I. Blood respiratory, acid-base and ionic states. *J. Exp. Biol.* **128**, 235-253.
- Rohrer, D. K., Chruscinski, A., Schauble, E. H., Bernstein, D. and Kobilka, B. K. (1999). Cardiovascular and metabolic alterations in mice lacking both  $\beta_1$ - and  $\beta_2$ -adrenoceptor receptors. *J. Biol. Chem.* **274**, 16701-16708.
- Rybin, V. O., Xu, X., Lisanti, M. P. and Steinberg, S. F. (2000). Differential targeting of  $\beta$ -adrenoceptor subtypes and adenylyl cyclase to cardiomyocyte caveolae. A mechanism to functionally regulate the cAMP signaling pathway. *J. Biol. Chem.* **275**, 41447-41457.
- Schwerte, T., Prem, C., Mairosi, A. and Pelster, B. (2006). Development of the sympatho-vagal balance in the cardiovascular system in zebrafish (*Danio rerio*) characterized by power spectrum and classical signal analysis. *J. Exp. Biol.* **209**, 1093-1100.
- Shaner, N. C., Campbell, R. E., Steinbach, P. A., Giepmans, B. N., Palmer, A. E. and Tsien, R. Y. (2004). Improved monomeric red, orange and yellow fluorescent proteins derived from *Discosoma* sp. red fluorescent protein. *Nat. Biotechnol.* **22**, 1567-1572.
- Steele, S. L., Lo, K. H., Li, V. W., Cheng, S. H., Ekker, M. and Perry, S. F. (2009). Loss of  $M_2$  muscarinic receptor function inhibits development of hypoxic bradycardia and alters cardiac beta-adrenergic sensitivity in larval zebrafish (*Danio rerio*). *Am. J. Physiol. Regul. Integr. Comp. Physiol.* **297**, R412-R420.
- Tanoue, A., Koba, M., Miyawaki, S., Koshimizu, T., Hosada, C., Oshikawa, S. and Tsujimoto, G. (2002). Role of the  $\alpha_{1D}$ -adrenoceptor in the development of salt-induced hypertension. *Hypertension* **40**, 101-106.
- Thomas, P. and Smart, T. G. (2005). HEK293 cell line: a vehicle for the expression of recombinant proteins. *J. Pharmacol. Toxicol. Methods* **51**, 187-200.
- Tumova, K., Iwaszow, R. M. and Tiberi, M. (2003). Insight into the mechanism of dopamine D1-like receptor activation. Evidence for a molecular interplay between the third extracellular loop and the cytoplasmic tail. *J. Biol. Chem.* **278**, 8146-8153.
- Tumova, K., Zhang, D. and Tiberi, M. (2004). Role of the fourth intracellular loop of D1-like dopaminergic receptors in conferring subtype-specific signaling properties. *FEBS Lett.* **576**, 461-467.
- Wang, Y., De, A. V., Gao, X., Ramani, B., Jung, Y. S. and Xiang, Y. (2008). Norepinephrine- and epinephrine-induced distinct  $\beta_2$ -adrenoceptor signaling is dictated by GRK2 phosphorylation in cardiomyocytes. *J. Biol. Chem.* **283**, 1799-1807.
- Wang, Z., Nishimura, Y., Shimada, Y., Umamoto, N., Hirano, M., Zang, L., Oka, T., Sakamoto, C., Kuroyanagi, J. and Tanaka, T. (2009). Zebrafish  $\beta$ -adrenoceptor mRNA expression and control of pigmentation. *Gene* **446**, 18-27.
- Xiao, R. P. (2001).  $\beta$ -adrenoceptor signaling in the heart: dual coupling of the  $\beta_2$ -adrenoceptor to Gs and Gi proteins. *Sci. STKE* **104**, RE15.
- Xiao, R. P., Avdonin, P., Zhou, Y. Y., Cheng, H., Akhter, S. A., Eschenhagen, T., Lefkowitz, R. J., Koch, W. J. and Lakatta, E. G. (1999). Coupling of  $\beta_2$ -adrenoceptor to Gi proteins and its physiological relevance in murine cardiac myocytes. *Circ. Res.* **84**, 43-52.
- Xiao, R. P., Zhang, S. J., Chakir, K., Avdonin, P., Zhu, W., Bond, R. A., Balke, C. W., Lakatta, E. G. and Cheng, H. (2003). Enhanced Gi signaling selectively negates  $\beta_2$ -adrenoceptor (AR)-but not  $\beta_1$ -AR-mediated positive inotropic effect in myocytes from failing rat hearts. *Circulation* **108**, 1633-1639.
- Zheng, M., Han, Q. D. and Xiao, R. P. (2004). Distinct  $\beta$ -adrenoceptor subtype signaling in the heart and their pathophysiological relevance. *Sheng Li Xue Bao* **56**, 1-15.
